# Supplementary material for: A Scoping Review of the Oral Health Status, Oral Health Behaviours and Interventions to Improve the Oral Health of Children and Young People in Care and Care Leavers
Source: Dent J (Basel). 2024 Feb 9;12(2):38. doi: 10.3390/dj12020038 (PMC10887692; doi:10.3390/dj12020038)
Supplement: Supplementary file 1 [file dentistry-12-00038-s001.zip › Table S2_ Data extraction table.xlsx]

## Sheet: Full text data extraction form
Title	Author/date	Aims/objectives	Setting	Study design (RCT, commentary etc.)	If an intervention. Co-produced?	Duration	Country	HDI	Sampling method	Care			Setting			Sample size	Description of intervention (where applicable)	Data collection tools	Main dental health outcomes				Participant characteristics (professional)				Participant characteristics (young person)			Results	Limitations	Conclusions	Recommendations	Gaps in research	Comments
Medical and dental health status of orphan children in central Saudi Arabia	Al-Jobair et al. (2013)	To evaluate the medical and dental health status of orphan children from 4 to 12-years-old, and compare them with children living with their parents	Orphanage	Cross-sectional study	N/A	July 2011 to January 2012	Saudi Arabia	Very high	All 3 orphanages located in Riyadh housing orphan children were included in the study. All orphans aged 4-12 years with permanent residency in these orphanages were included.	formal			orphanages			180 90 CiC, 90 control		Clinical exam Questionnaire	intra-oral examination- The caries status of the teeth was scored according to the criteria of the World Health Organization (WHO) using the indices of"Decayed-Missing and-Filled Teeth/ Surfaces" (DMFT/DMFS) for the permanent teeth and, the "decayed-missing and-filled teeth/surfaces" (dmft/dmfs) for the primary teeth.13 The oral hygieneindex 0(HI) described by James et al was utilized in this stu…							in care	4-12 yrs. Approx 75% male	Not reported	Not reported	See Appendix 8 Approximately 36% of the orphans had medical conditions compared co 14.4% of the control children. The control children visited the dentist more than the orphans (p<0.001). Approximately 96% of the orphans had dental caries compared to 90% of the control children (p<0.001). Decayed-missing and-filled teeth/surface index scores were higher among orphans (p=0.004) compared to the con…		Medical health conditions were more prevalent among orphans living in government orphanages, but they were provided with good and continuous medical care. However, they had more dental caries and worse oral hygiene, as dental care was provided to chem only in case of emergency. The dental health conditions were worse among the orphans as noted by the presence of higher levels of untreated carious…	Based on the results of the present study, there is an apparent need for dental health programs to target this segment of the population in order to improve their oral health status and prevent oral diseases. The government should also focus on providing orphans with regular dental check ups through small dental clinics in the orphanages and a dentists that can follow up and treat these children …	Further studies including a larger sample size from orphanages in different parts of the Kingdom should be conducted. In addition, other orphans who are hosted by host families should be included for the sake of comparison.
Oral lesions and dental status among institutionalized orphans in Yemen: A matched case-control study	Al-Maweri et al. (2014)	The aim of this study was to assess the prevalence of oral mucosal lesions (OMLs) and dental caries and to evaluate oral health practices among institutionalized orphan-children in Sana’a city, Yemen	Orphanage	Matched case-control study	N/A	Not reported	Yemen	Low		Formal			orphanages			404 202 CiC, 202 control		Clinical exam Questionnaire	Clinical examination included assessment of OMLs based on standard international diagnostic criteria and evaluation of dental status using the Decayed/decayed, Missed/missed and Filled/filled (DMFT/dmft) index according to World Health Organization recommendations.	oral hygiene practices were obtained by interviewing each subject using special questionnaire form.						in care	12-15 yrs 77% males	Not reported	Not reported	Nine types of lesions were reported among orphans; the most common lesions were fissured tongue (24.3%), herpes labialis (7.9%) and traumatic ulcers (2.5%). The occurrence of herpes labialis was found to be significantly higher in orphans than in controls (P < 0.01). The prevalence of dental caries was insignificantly lower among the orphans (84.7%) compared with the non-orphans (89.61%; P = 0.13…		Our study found a high prevalence of OMLs, poor oral hygiene practices, but lower prevalence of dental caries among orphans when compared with non-orphan school children.	There is an apparent need for dental health programs to target the institutionalized orphans in particular and school children in general in order to improve their oral health status and prevent oral diseases.
Oral habits, dental trauma, and occlusal characteristics among 4- to 12-year-old institutionalized orphan children in Riyadh, Saudi Arabia	AlSadhan et al. (2017)	to assess the oral habit practices, dental trauma, and occlusal characteristics of 4- to 12-year-old orphans living in governmental orphanages in Riyadh.	Orphanage	Cross-sectional study	N/A	Not reported	Saudi Arabia	Very high	The institutionalized orphans were recruited from three governmental orphanages	Formal			orphanages			90		Clinical exam Questionnaire	The clinical examination was carried out for both orphans and controls by one examiner, and the data were recorded by one recorder. Each child was examined in the orphanage's clinic or class room in a supine position using penlight, a disposable examination kit, and calibrated ruler. The mouth and teeth were examined for any signs of oral habits and trauma. The teeth were also examined for the pr…	Questionnaire						in care	4 -12 yrs. 77% male.	Not reported	Not reported	See Appendix 9 Over 21% of the orphans had dental trauma compared to 10% of the control group (p < 0.040) (Table 2), with tooth fracture being the most common type and more prevalent among orphans. About 70% of the dental trauma occurred in permanent teeth among the orphan children; however, 85% of the dental trauma affected primary teeth in the control children. Table 2 shows also that dental tr…	Care should be taken when comparing the results of this study to others, due to the difference in orphanage system and selection criteria. Institutionalization of orphans in different countries is mainly because of poverty, war, parents’ death, family break down, and family conflict. However, in Saudi Arabia, orphans are usually institutionalized due to unknown parentage.	More permanent teeth were traumatized in orphans while more primary teeth were traumatized in the control children. Dental trauma affecting the primary teeth usually occur due to falling or hitting against hard objects, however, in permanent dentition, trauma usually occur due to contact sports, fight, or car accidents.32 Dental trauma increased as the orphans got older, which might be because am…	Foster mothers and employees taking care of the orphans need to be aware of the deleterious effects of oral habits and dental trauma. Most foster mothers lack information on the problems faced by these children and are, therefore, unable to offer emotional support. Therefore, counseling and psychological training should be provided to the foster mothers and orphans’ teachers, and they should be e…
Impact of DMFT, PUFA, DAI, and TDIs on Oral Health-Related Quality of Life (OHRQoL) Among Foundling, Delinquent, and Mainstream School Children: A Prilimenary Study	Alsaif et al. (2022)	To assess oral health and its implication on oral health-related quality of life (OHRQoL) among groups of foundling and delinquent children compared to mainstream children in Riyadh, Saudi Arabia.	Care home	Cross-sectional study		Not reported	Saudi Arabia	Very high	Only children were recruited in the study and unwilling children and those who were unable to respond to the study due to mental or physical disability were excluded.	Formal			Care houses		“Foundling” refers to a child that has been stranded by his or her parents and under the care of other people (20). In contrast, “delinquent” refers to a child who has broken the law or is involved in the indecent or immoral activity and requires rehabilitation	99		Clinical exam Questionnaire	clinical oral health condition including the decayed, missing, and filled teeth (DMFT) and pulpally involved, ulceration, fistula, and abscess (PUFA) indices, Dental Aesthetic Index (DAI) index for malocclusion, and TDIs		questionnaire (see paper, table 1). Data not usable as not seperated into delinquent/ foundling/mainstream groups?	Demographic information (age and gender), subjective oral health condition, OHRQoL, This questionnaire was divided into four parts concerning oral symptoms (6), functional impediments (9), emotional well-being (9), and social well-being				In care	11-14 yrs	Not reported	Not reported	See Appendix 10 The total OHRQoL score was significantly higher for the delinquent compared to the mainstream group. In addition, the DMFT and mean PUFA scores were significantly higher for the delinquent group than the others. The DAI revealed statistical significance in occlusion status within the foundling and delinquent groups, and the prevalence of TDI was significantly higher in the delinqu…	The small sample size was a limitation of the study, so we recommend a larger sample for future studies. The key variables such as socioeconomic status, social capital, and other structural factors of neighborhoods, and parental education of all groups were not included in the study. These children do not have any of these details, hence were not used in the study. This is also a potential limita…	With in the study limitations a significant impact on oral health status (DMFT and PUFA indices, malocclusion, and TDI) on the OHRQoL for both foundling and delinquent children compared to mainstream children. However, in the mainstream children, the DMFT and PUFA indices and malocclusion significantly impacted OHRQoL, whereas no significant impact forms TDI was observed. Oral health status appea…	Further studies are waarrent to establish OHRQoL among foundling and delinquent children in Saudi Arabia.
Dentition status and treatment needs among orphans in Riyadh city, Saudi Arabia: A cross-sectional descriptive study	Alsayeh et al. (2020)	assess the prevalence of dental caries in orphaned children in Riyadh, Saudi Arabia.	Orphanage	Cross-sectional study		Not reported	Saudi Arabia	Very high	Random sampling	Formal			orphanages			238		Clinical exam Questionnaire	clinical exam All examinations were carried out in a well-lit room. Instruments used in examinations weredisposable dental examination kit,which consisted of a dental examination mirror Kerr model PE9401, Anhui, China, double-ended probe (examination/perio WHO-type 3.5, 5.5, 8.5 & 11.5mm) Kerr model PE9401, Anhui, China, tweezers Kerr model PE9401, Anhui, China, masks Kerr model PE9401, Anhui, Ch…	A structured questionnaire The respondents were asked questions on basic knowledge, such as frequency of brushing, technique of brushing, and methods and aid used for cleaning oral cavity. We added a question about the use of miswak as a method for taking care of oral health. Miswak is a traditional chewing stick prepared from the roots, twigs, or stem of Salvadora persica tree and has been used …						in care	6-18 yrs (74%) male	Not reported	Not reported	Results revealed that 37% of the participants reported that they do not brush their teeth, 23% of the participants reported that they do not brush regularly,17% of the participants reported that they brush one time daily and 23% of the participants reported that they brush twice daily (Fig. 3), which indicate that the participants were highly susceptible to dental caries. When evaluating the time…	In our research, there are limitations; firstthe data collected for habits and practices may be limited. Secondly, there were some difficulties faced in achieving a balance between the number of male and female orphans due to refusal from some females to participate which influenced the result of the research. Third, the data on oral health knowledge, attitudes, and practices of orphan children w…	Death or absence of one or both parents can lead to bad oral health of children. Thus, orphaned children are vulnerable and are potentially at an increased risk for poor health. This study shows that there is a great need for implementing preventive measures among orphaned children living under special circumstances. This research is the first study of its kind conducted in Saudi Arabia and there…
Oral health needs of HIV/AIDS orphans in Gauteng, South Africa	Blignaut et al. (2007)	A crosssectional, prospective study was conducted on a convenience sample of HIV-positive children, living in orphanages in Gauteng, South Africa, in order to determine the oral health needs of the children	Orphanage	Cross-sectional			South Africa	High	Convenience sampling.	formal			orphanage			87 CiC 11 caregivers		Survey Interviews with care givers Clinical exam (children)	oral examination of children. Where indicated, the examiner pushed the lips, cheeks and tongue aside with a finger, to secure a better view and oral conditions were noted and classified according to set criteria (CDC, 1987; Ramos-Gomez et al., 1999). A swab was taken of the dorsal surface of the tongue, as the site where oral yeasts were most likely to be concentrated (Arendorf & Walker, 1980). C…			Eleven caregivers, who were on duty at the time of the survey, were interviewed to establish their knowledge regarding oral complications and oral health care of the children. The nursing sisters (registered nurses) were excluded because of their formal training in health care	not specified	not specified	caregivers	in care	1-11 yrs 49 boys, 38 girls	not reported	more than 6 months	See appendix 5 Rampant early childhood caries in 19 (21.8%) children was the major finding, with 5 children suffering severe pain from multiple carious teeth. In the hospice section of the homes all 12 children had clinically detectable candidiasis, while in 4 (33.3%) there was an associated bleeding and ulceration of the oral mucosa, impairing their ability to eat. The outcome of a structured in…	none reported		The sharing of toothbrushes is of concern as it could contribute to cross-contamination of microorganisms, including oral yeasts, among the children. no immediate reduction in the numbers of paediatric HIV/AIDS patients is expected, despite the perception that ART will dramatically change manifestations of the HIV/ AIDS epidemic. ART in itself, and other medication for paediatric patients, in the…
Oral health status, knowledge, attitudes and behaviours among marginalized children in Addis Ababa, Ethiopia	Burnett et al. (2016)	We assessed the prevalence of dental decay and gum disease and oral health practices and its barriers.	Orphanage	Cross-sectional		1 summer	Ethiopia	low	We enrolled all children who came into the clinic or were in orphanages during the study period	formal			orphanage			132		Interviews Clinical exam	Primary outcome: prevalence of gross dental caries (binary) Secondary outcomes included a participant’s total number of teeth (continuous), evidence of bleeding upon brushing as an indicator of gum disease (binary) and dietary habits (categorical).	dental hygiene knowledge, attitudes and behaviours (categorical and/or binary).						in care	6-15 yrs. 50%male	not reported	not reported	The main reason for not brushing teeth was the cost of brushing tools (88%). Seventy-four percent of participants had between 1 and 13 dental caries, and 52% bled upon brushing In bivariate analysis, children who did not clean between their teeth were more likely to consume sugary food (p < .05) and have oral pain within the past six months (p < .01). Male participants were more likely to clean b…	There were several limitations to our study. Data on behaviour were self-reported and likely affected by social desirability in responses. However, there was a significant correlation between important indicators reported by children and observed physical findings such as reported and observed bleeding upon brushing. We did not have the capacity to do comprehensive assessments such as for the dec…	Our study sheds light onto the significant disparity of oral health needs among underserved and marginalized children in Addis Ababa. A dearth of oral health services and tools, access issues for underserved populations, lack of comprehensive, in-depth knowledge in regards to proper dental hygiene practices, limited access to healthy diets and an absence of broader national oral health policies w…	We developed and implemented an ongoing oral health education curriculum targeting both children and their caregivers, which was offered at the conclusion of the study. However, in order to enact the most change, targeted knowledge pathways that are specific and customized to specific groups and individuals must be adopted and directly tied to a rigorous evaluation of attitude and behaviours. Edu…		After the completion of the surveys and exams, an adapted educational programme covering important topics related to oral health was offered to all participants. To facilitate understanding, a flip-book was created with photographs of young Ethiopian locals illustrating each concept. The images-only flip-book has proven useful to convey concepts to sub-literate populations (Houts et al., 2006; Mo…
Assessment of children coming into care: processes, pitfalls and partnerships	Chambers et al. (2010)	To develop a process which could be accessed for any child entering long-term care, to pro-vide a comprehensive physical, developmental and mental health assessment, and effective access to appropriate treatment2. To use this process to assess an initial sample of children to assist in planning for services needed for this group of children3.The process would include both health and welfare compo…	Out of home care - foster, residential	Intervention development	unclear	unreported	Australia	Very high	Convenience/snowball The study recruited children and young people living within the boundaries of the Sydney West Area Health Service, the health area covered by the existing clinic. The study focused on children entering long-term care as a way of identifying a group who would remain in care for a significant developmental period, and who represent over 75% of those in care in this region, at a…	both					Unclear	52	For several years the Alternate Care Clinic, a Child and Adolescent Mental Health Service for children in care, has been run from an area-based child and adolescent tertiary treatment service in Sydney, NSW. This clinic is a joint project of the local publicly funded health and child welfare services. The clinic takes referrals directly from the welfare sector for children considered tohave high …	Health sceening tool (dental assessment)	Clinical exam							in care	4 months - 12 yrs more boys attending (31) than girls (21).	. Twenty-three per cent of the children were of Indigenous Australian descent.	The duration of children’s current placements ranged from one month to four years, with an average length of approximately one year (14 months).	See appendix 13 Half (52%) of the children over 5 years (n = 26) were found to have dental problems.	This project was limited in scope. The specific findings relating to rates of disorder are affected by the potential for referral bias in the process, i.e. while referral was open to all case managers, and encouraged by welfare management, uptake was variable across the area, and children raising concern may have been more likely to be referred, although some case managers adopted a univer-sal re…	This project explored the challenge of providing health assessments to children coming into long-term care. Processes to do this are needed if children and their carers are to have timely and effec-tive and appropriate assistance: but this is only one of many areas requiring exploration. Once a clear understanding of the difficulties – and the strengths – of the child has been established, the qu…	This project demonstrated that a centralized, direct referral system for a comprehensive assessment and review process could be created, which was usable for both the health and welfare sectors. It required the development of joint processes and ongoing facilitation by designated staff in both sectors. This system utilized both a specific assessment and review service, and then refer-ral to exist…
Assessing the health status of children entering foster care	Chernoff et al. (1994)	Our objectives are: (1) to describe the physical and mental health of children at the time of entry into care; (2) to describe the number and kinds of actions taken for identified health problems; and (3) to contribute to ongoing efforts to develop appropriate models for deliveringhealth careservices to children in foster care.	Foster care	Health Report	N/A	May 1989 through May 1991	USA	Very high	Purposive Level 1 services were provided in a health suite established on the premises of the Baltimore City Department of Social Services. Children were brought to the health suite for a complete screening within 5 working days of entering foster care. Two pediatric nurse practitioners (PNPs), with a combined total of 25 years of experience with duldren in Baltimore, examined thecl1ildren. Their…	Formal			In foster care		Unclear	1407		Clinical exam	Dental problems in­ cluded orthodontic problems, plaque, severe dental caries, and missing teeth.							In care	Age 0- 12 51.2% male	Black - 84.3% White- 14.2% Other- 1.5%	Entered care in the last 5 days	For children >3 years of age, more than half needed urgent or nonurgent referrals for dental services (N=533 (37.9% of cohort)	Before we try to answer th.is, several limitations of our study should be noted. At the time a child entered foster care, medical history data were based on re­ ports from protective service workers, who fre­ quently did not have access to information from a family member. Historical data also may have been incomplete due to the adversarial nature of many foster care placements and the consequent…	Data on the prevalence and range of health needs of children at the time they enter foster care, therefore, have clear implications for pediatricians as they examine chil­ dren entering foster care; for foster parents as they care for these children; and for case workers who are attempting to develop and implement care plans. Our objective in this report was not only to describe the health needs …	1. Effort should be made at the time of removal of the child to complete the health assessment as quickly as possible 2. The health examination should cover as many areas as possible. 3. More energy should be invested in developing systems for documenting and commrmicating the health problems nnd health histories of foster children at placement 5. A system should be organized to track the childre…
An epidemiological study of dental caries and associated factors among children residing in orphanages in Kerala, India: Health in Orphanages Project (HOPe)	Christian et al. (2019)	The objectives of this study were: (i) to describe caries prevalence and experience; and (ii) to identify risk factors for caries among 6- and 12-year-old children residing in orphanages in the State of Kerala, India.	Orphanage	Cross-sectional	N/A	Not reported	India	Medium	simple random sampling	Formal			Orphanages			1,137		Clinical exam Questionnaire	The International Caries Detection and Assessment System’s (ICDAS) caries codes 1 and 2 were used to define non-cavitated lesions in this study15. Caries data were recorded at the tooth level. The clinical examination process was visual (i.e. no examination explorer), using a standardised intra-oral mouth mirror light source Following a training session using photographs of caries lesions, dental…	A questionnaire was used to capture information on child oral health behaviours. For children below the age of 11 years a caregiver familiar with the child was invited to complete the questionnaire. Children aged 11 years and older were invited to self-complete the questionnaire, with adult assistance (in most instances an orphanage caregiver) provided where required.						In care	1-18 yrs 82% female	not reported	not reported	Caries prevalence (including non-cavitated lesions), in the primary dentition of 6-year-old children (Table 1), was 77% with a mean dmft score of 3.60 (SD = 3.50); and for cavitated lesions only, caries prevalence was 69%, with a mean dmft of 3.00 (SD = 3.18) (data not shown). For the permanent dentition (Table 1), caries prevalence (including white spot lesions) for 12-year-old children was 44% …	A limitation of this study was the use of visual only (no examination explorer) examination for dental caries. As such, the lack of using an explorer may have resulted in an increased false-negative rate of dental caries and an underestimation of the true population caries estimate. The value of visual-based caries detection is exemplified by ICDAS, which is essentially a visual system. Use of an…	To conclude, caries rates among children in orphanages appear to be much higher than those of children in the general population and further research is required to study the effect of social isolation on oral health. There is an urgent need to continue to investigate the general and oral health of children in orphanages across India, and for local stakeholders to develop and implement effective …	An interesting observation in this study was the gender imbalance, with 82% of participants being girls. This could either be an artefact of the sampling methodology or a result of the well-documented disadvantage of girl children in India26, and will need further investigation From this investigation of potential predictors of caries among this population, it was interesting to note that there w…
Molluscum contagiosum and dental caries: a pertinent combination	Dixit et al. (2009)	To explore the DMFT/deft status in various orphanages from Pune, India. To find out differences, if any, between the DMFT/ deft status in orphanages from Pune, India and the general population of children below 12 years of age in Maharashtra state, India as well as all over India	Orphanage	Cross-sectional	N/A	Not reported	India	Medium	Purposive children selected from three orphanages from Pune, India. Informed consent was taken from the Managing Directors and the consulting pediatricians of the orphanages selected for the study.	Formal			Orphanages			207		Clinical exam	DMFT/ deft status of the children was determined using WHO criteria							in care	1-12 yrs	not reported	not reported	DMFT/deft of the orphanages was found to be 2.58 in the age group 1-5 years and 2.5 in the age group 6-12 years with caries prevalence in 70.27% of the children [Table 1].		According to the National Oral Health Survey, 2002- 2003, the mean DMFT/deft is 1.9 in the 1-5 and 1.8 in the 6-12 years of age groups in Maharashtra, India.[4] Likewise, the mean DMFT/deft is 2.0 in the 1-5 and 1.8 in the 6-12 years of age groups in India.[4] These index values are similar to the ones found elsewhere in India. However, the mean DMFT/deft was found to be 2.58 and 2.5 in the orpha…	High risk group children with primary teeth decay should be identified and categorized, which in turn is useful to determine needs for restorations and to implement primary preventive procedures in the targeted group.
ORAL HEALTH-RELATED KNOWLEDGE, BEHAVIOUR AND STATUS IN A GROUP OF INSTITUTIONALIZED CHILDREN IN VALENII DE MUNTE, ROMANIA	Dumitrache et al. (2020)	The aim of the present study was to assess the oral health-related knowledge, behavior and status among children enrolled in ”Sfânta Maria” Children Care Center in Vălenii de Munte, Romania.	Care home	Cross-sectional study	N/A	Not reported	Romania	very high	Purposive Prior to the study, ethical approval and informed consent were obtained from the university, legal representatives of the children and manager of the care center	Formal			permanently enrolled in the care center			38		Clinical exam Questionnaire	Clinical examinations were performed in the medical office of the care centre, using mobile dental units, under proper light, with disposable dental examination instruments. For caries status evaluation, International Caries Detection and Assessment System code system was used as an evidence-based system for dental caries’ classification and detection in dental public health, even if, for researc…	The oral health-related knowledge and behavior were assessed using a questionnaire containing 13 closed-ended and 3 open-ended questions regarding the known causes of dental caries, oral hygiene products used, food consumption, frequency and reasons for dental office visits.						in care	7-19 yrs 79% female.	not reported	not reported	See Appendix 15 Even if most of the subjects declare tooth brushing twice a day (78.94%), only half of them choose both evening and morning as the time of the day, while 26.31% declare they never attended a dental check-up. Clinical examinations revealed a dental caries prevalence of 92.10% and a mean D3-6MDT value of 8.65±5.64, as a result of a high number of cavities and a low number of restora…	The study aimed at presenting an overall oral health status of the entire group of children enrolled in the care centre but, because of the small sample size, the data could not have been analysed by independent variables like age, sex or time spent in the care centre. Moreover, the data collected about the oral health knowledge and behavior was subjective, based on self- assessment or declared i…	The children evaluated have unsatisfactory oral hygiene, insufficient utilization of the dental services, an increased prevalence of dental caries and a high number of untreated cavities. However, children are unaware of their improper behavior or of the severity of the carious disease, most of them overestimating their oral health status.
Oral health of children and adolescents with or without attention deficit hyperactivity disorder (ADHD) living in residential care in rural Rhineland-Palatinate, Germany	Ehlers et al. (2019)	The aim of the study was to assess oral health parameters of children and adolescents with or without ADHD living in residential care under supervision of specially trained caregivers.	Care home	Cross-sectional study	N/A	not reported	Germany	Very high	Purposive Prior written consent was obtained from all parents or guardians of participating children and adolescents; participation in the study was voluntary.			Unclear some children spent weekends with their family?	Residential			79 34 participants with ADHD and 45 participants without ADHD (control).		Clinical exam Questionnaire	All participants of the study were examined by the same investigator (SW), who was previously trained by a paediatric dentist (BA). Dental examinations included decayed, missing, filled surfaces/teeth in the secondary dentition (DMFS/ DMFT), decayed, missing, filled teeth in the primary dentition (dmft), and API (approximal plaque index %) according to Lange et al. [19]. Only cavitated lesions we…	A comprehensive questionnaire was developed and used in this study to assess oral hygiene and dietary habits (Additional file 1). All possibilities for oral hygiene were listed in the questionnaire. In addition, for each meal and for the time between meals, the possibilities were listed in an impartial manner to allow for honest answers. The children and adolescents themselves were asked to compl…	Data on last dental visit (time since, treatment received)					in care	9-15 years 79.4% male	not reported	The children and adolescents from the ADHD group lived in residential care with a mean of 21.3 ± 15.7 months, and those of the control group with a mean of 25.2 ± 30.3 months.	See Appendix 16 The findings of the present study show the need for considerable improvement of oral hygiene and dietary habits in children and adolescents, who live in residential care. In children with ADHD, the most effective method of reducing dental caries seems to be more frequent dental visits with a) instructions for better oral hygiene at home and b) dietary counselling to reduce the con…	One of the limitations of the present study is the relatively small sample size of 79 participants, but which is similar to the study of Chau et al. [7]. Only simplified examinations were conducted on site in rooms of the residential care setting and no recent dental radiographs were available and no new ones could be taken; thus, it was not possible to reliably identify non-cavitated lesions. Mo…	The findings of the present study show that there was no statistically significant difference in oral health of children and adolescents with or without ADHD living in residential care. However, ADHD participants had higher DMFT/DMFS values and consumed more cariogenic drinks and food. In addition, ongoing orthodontic treatment was performed less often in these participants.	Parents and guardians need better instructions for a more sufficient supervision of oral hygiene and dietary habits in children and adolescents with or without ADHD.
Dental care interventions as efforts to reduce pufa index and improve nutritional status in children aged 9-12 years in orphanages	Fadjeri et al. (2021)	This research aims at effectiveness Dental Care Interventions as Efforts to Reduce PUFA Index and Improve Nutritional Status in Children aged 9-12 Years in Orphanages	Orphanage	Quasi experimental	Unclear	august-sep 2019	Indonesia	high	purposive sampling	formal			Orphanage			32 CiC 32 control	Samples were divided into 2 groups, the intervention group was given dental care measures and the control group was only given mouth rinses. Before examining the oral cavity we provide counseling on how to maintain healthy teeth and what are the effects if cavities are not treated. The next step is to conduct a pre-test in the form of examination of PUFA index and nutritional status in the form o…	Clinical exam	1. Then the research intervention was carried out, in the intervention group the form of treatment performed was tooth extraction and dental fillings using mashed garlic and covered with temporary fillings. Whereas the control group gargled with warm salt solution.							in care	9-12 years 53.12% male	not reported	not reported	Table 2 shows, the average PUFA index in the intervention group was 1.44 before treatment and in the control group was 1.28, which means that there were an average of 2 cavities that were not treated. After dental treatment in the form of dental fillings and extractions, the average PUFA was found to decrease to 0.47 in the intervention group while in the control group it was 1.09. This table als…		Based on the results of the study, it can be concluded that: 1. Dental care interventions were proven to be significantly (p <0.001) effective in increasing the PUPA index of children in the Mizan Amanah orphanage. 2. Dental care interventions were shown to be significantly (p <0.001) effective in improving the nutritional status of Mizan Amanah orphanages. 3. Dental care interventions in the for…	Judging from the type of treatment, dental filling interventions provide changes in nutritional status better when compared to treatment of extraction. In the case of filling most of the cavities are already on the pulp, causing pain when used for chewing and after filling the pain is reduced so that it can perform mastication function is better and there is an increase in nutritional status. Pat…
Prevalence of bruxism and temporomandibular disorders among orphans in southeast Uganda: A gender and age comparison	Friedman et al. (2018)	The aims of the current study were: (1) to assess the prevalence of oral habits, bruxism, and temporomandibular disorders (TMDs) among children living in Uganda; (2) to establish whether parafunctional activities are associated with TMDs; and (3) to examine the possible impact of gender and age on the prevalence of bruxism, oral habits, and TMDs.	Orphanage	Cross-sectional	N/A	summer 2003	Uganda	Medium	Purposive The orphanage director and legal guardian of the chil- dren residing in Bussi Island Children’s Home signed an informed consent approval form beforehand	Formal			Orphanage			153		Clinical exam Questionnaire	The clinical examination was carried out on the orphanage premises. The author examined each child in a well-lit classroom in an upright position using a small flashlight and a disposable mouth mirror. The TMD examination and diagnosis was performed according to the Axis I criteria of the Research Diagnostic Criteria for Temporomandibular Disorders (RDC-TMD) recommendations. A definitive TMD diag…	(1) Oral habits: All participants were asked about performing any of the following on a daily basis: Biting down on hard objects (pens, pencils, etc.); crushing hard candies, ice, popsicles, etc. with the teeth; biting fingernails; lip biting; and gum chewing.						In care	Age 6-17 yrs 41% male	Not reported	Not reported	SEE appendix 17 TMDs were moderately prevalent (35%). Parafunctional habits were performed by 93% of the participants. When performed extensively, they were significantly related to myalgia. No gender or age significant differences were found	Study limitations (1) The study group was a convenience sample that included children residing in an orphanage. No sample size estimation was possible due to the limited number of similar studies con- ducted in Uganda. The orphanage director and legal guardian of the children residing in Bussi Island Children’s Home stated that his orphan- age is representative of other orphanages in the country.…	Despite the previously mentioned limitations, the authors concluded the following: (1) Only extensive masticatory parafunctional oral activity (at least three daily oral habits) is signif- icantly related to myalgia. (2) In this young cohort, gender and age had no impact on the prevalence of bruxism, oral hab- its, and TMDs. (3) Sleep and awake bruxism were not related to anamnestic symptoms or c…
Prevalence of untreated dental caries in Latin American children in the Spanish child protection system	Gonzalo et al. (2020)	to investigate the prevalence of untreated dental caries in immigrant children of Latin American origin who enter into the child protection system of the Autonomous Community of Aragon (Spain) and to observe if there is an association with demographic factors, body mass index (BMI), or vulnerability circumstances	Residential care	Cross-sectional study	N/A	2000-2019.	Spain	Very high	Purposive all immigrant children of Latin American origin, with an age range between 6-17 years-old, who entered residential care of the child protection system of the Autonomous Community of Aragon (Spain) during the period 2000-2019.	Formal			Residential care			231		Retrospective chart/register review	For oral evaluation, the WHO standardized protocols and forms [14] and the FDI notation were used [6]. To perform the oral examination, among other instruments, plane mouth mirror Cone Socket#5 and metallic periodontal probes with ball tip conforming to WHO specifications were used. A tooth was considered present in the mouth when any part of it was visible							In care	6-17 yrs 55.8% female	The countries with the highest representation in the sample were Ecuador, Colombia, the Dominican Republic, and Brazil, comprising 69.3% of the total	not reported	The presence of untreated dental caries was significantly higher in children of the age group 6-13 years-old (p<0.001) and those belonging to the second-generation (p=0.004) and was higher, but without statistical significance in children from Ecuador and the Dominican Republic. The absence of untreated dental caries was significantly higher in children of the age group 14-17 years-old (p<0.001) …		The prevalence of untreated dental caries in the sample of Latin American children in the child protection system of Aragon (Spain) was higher than that of autochthonous children. Ecuador and the Dominican Republic were the countries of origin with the highest prevalence. The presence of untreated dental caries showed a positive association with the age group 6-13 years-old, the second- generatio…
Assessment of Traumatic Dental Injuries among Institutionalized Orphan Children: A Cross-sectional Study	Goswami et al. (2022)	Traumatic dental injuries (TDIs) To determine the prevalence of TDIs in institutionalized orphan children		Cross-sectional	N/A	Not reported	India	Medium	Purposive It was conducted in six institutions for orphan children in New Delhi. The study’s procedure and purpose were explained to the authorities and children, and informed consent was obtained.	Formal			Orphanages			500		Clinical examination	The “Dental Trauma Status” was evaluated using the WHO oral health assessment form for children 2013							In care	5 to 14 yrs 69.7% males	not reported	not reported	Out of 500 children, the prevalence of TDI among the study sample was 5.8% (n = 29). It comprises enamel fracture, enamel and dentin fracture, fracture involving pulp, loss of a tooth due to trauma, as shown in Figure 1. The prevalence of dental trauma was more common among the age group of 10–12 years, as shown in Figure 2. The prevalence was highest in the age group of 10 years and lowest in th…		The current study observed that young orphaned children (5–14 years) livings in orphanage institutions were prone to trauma and had untreated dental injuries. There is a paucity of data regarding TDI along with its risk factor among orphan children. Hence, there is a need to conduct more studies encompassing the prevalence and cause of TDIs among institutionalized children. Traumatic dental injur…	The need of the hour is to collect more data regarding dental trauma among institutionalized orphan children and their risk factors. The age at which children are more prone to traumatic injuries needs to be identified so that preventive measures can be put into effect to protect the risk population to a greater extent. The formulation and implementation of a plan taking into consideration the pr…
Oral health knowledge, Attitude and practices of children and adolescents of orphanages in jodhpur city rajasthan, India	Hans et al. (2014)	This study had twin objectives of assessing the oral health knowledge, attitude and practices and to assess the dental caries status and treatment needs among the orphan children of orphanages of Jodhpur city, Rajasthan, India		Cross-sectional	N/A	2 days	India	Medium	A total of 100 children aged 4 to 19 y resided in two orphanages and all of them were taken as the study population for this study.	Formal			Orphanages			100		Clinical exam Questionnaire	A pre- tested and validated questionnaire contained questions regarding the perceived oral health status, On completion of the questionnaire, each child underwent an oral examination. The examiner carried out the examination and the data was recorded by a recorder. Children were asked to sit comfortably on an ordinary chair with backrest in a well-illuminated and ventilated hall. The clinical exa…	A pre- tested and validated questionnaire contained questions regarding the perceived oral health status, knowledge of oral health and attitude, oral health practices, dietary habits and behaviour towards dental treatment. The children received a full explanation of how to fill in the questionnaire.						in care	4-19 yrs Male-95%	not reported	Less than 1 year- 7% 1-3 years- 33% 4-6 years- 29% 7-9 years- 24% 10-13 years- 7%	See Appendix 18 The questionnaire results were split up into three sections as knowledge of oral health, Attitude and oral health practices given in the [Table/Fig-5,​,66,​,7]7] respectively. [Table/Fig-8] describes the need for treatment among the orphans in relation to, decayed teeth and missing teeth.	The information on oral health knowledge, attitudes, and practices was collected by means of a questionnaire. Though close-ended questions are easier to analyse statistically, they have their own limitations [10].	The present study was conducted among school going orphans. Many of them had acquired knowledge on oral health. More than half of the study subjects were aware of the importance of keeping good oral hygiene, regular dental visits and harmful effects of tobacco. It was found out that a majority of children felt the need to visit a dentist. Almost 53% avoided the same due to fear of pain. Very few …	In a resource- limited country like India, innovative programmes organized by dental colleges can contribute in improving the oral health of underprivileged children. Incorporation of Oral health orientation program in the school education curriculum could bring changes in oral health behaviour and knowledge.
Impact of a single information session with oral hygiene instructions on unaccompanied minor asylum seekers living in Switzerland	Jenner, A. and Ramseier, C. A. (2022)	The aim of this study was to show whether a single information session with Oral hygeine instructions (OHI) can have an impact on adolescent asylum seekers.	Asylum centre	Pilot intervention evaluation	Not reported	May and June 2017	Switzerland	Very high	Purposive In consultation with the managers of the two asylum centres, a maximum group size of 25 participants was set so that all at- tendees could be addressed individually, the technique demon- strated and practiced together	formal			Asylum centres			30	These initial considerations led to the pilot project presented here, in which single information sessions with adequate oral hygiene instructions (OHI) were or- ganised and carried out with unaccompanied minor asylum seekers in two asylum shelters in Menziken (AG) and Suhr (AG), Switzerland The course of the information session with OHI was the same at both centres. The duration of the entire ev…	Questionnaire		For the instruction of OH, the Bass brushing technique was instructed with the help of images and short video sequences, with special emphasis on the systematic procedure, such as placing the toothbrush at a 45° angle and the small circular movements (www.mundhygiene-instruktion.ch/de/selection. php?hilfsmittel=A). The presentation was rounded off with a video of universal prevention messages pub…						in care	15- to 18 yrs 100% male	The countries of origin for the attendees were Eritrea (46.7%, n = 14), Afghanistan (30.0%, n = 9), Ethiopia (6.7%, n = 2), Somalia (6.7%, n = 2), Guinea (3.3%, n = 1), and Gambia (3.3%, n = 1). One attendee did not state his country of origin (3.3%, n = 1).	Not reported	See Appendix 20 . In total, 90% (n = 27) cleaned their teeth daily and 70% (n = 13) had received previous OHI at their school (19.1%) or a doctor’s practice (9.5%) in their country of origin or in Switzerland (19.1%), respectively. Following the event, 90% (n = 27) stated they had learned something new and 93.3% (n = 28) wanted to implement the instructions in their daily routine. While 63.3% (n …	An obvious weakness of this study is that no effects on the oral health of the adolescent asylum seekers were determined. The study participants were only interviewed before and immedi- ately after the event. Furthermore, no clinical parameters of the participants were examined and compared, or possible long- term successes of the single event were evaluated. Nevertheless, the overall aim of the …	With the results of the present study, the conclusions could be drawn that the implementation of information sessions with OHI may promote the oral health of adolescent asylum seekers.	In the future, more such events could be held and re-evaluated to examine the impact on individual behaviour and oral health of asylum seekers, as well as to capture long-term outcomes through longitudinal studies.
Clinical consequences of untreated dental caries assessed using PUFA index and its covariates in children residing in orphanages of Pakistan	Kamran et al. (2017)	the aim of our study is to report the clinical consequences of untreated decay in children living in orphanages of the twin cities of Rawalpindi and Islamabad, and the association of decay and untreated dental caries with demographics including type of orphanage, behavioural, and dental visiting pattern; and association of dental pain experience and type of orphanage with dental visiting.	Orphanage	Cross-sectional	N/A	Not reported	Pakistan	Medium	multistage random sampling	formal			orphanages			753		Clinical exam Questionnaire	Clinical examination of children was performed using the DMFT and PUFA index for the assessment of dental caries and untreated decay Two trained dentists carried out the clinical examination of children according to the WHO methodology (1997), under the supervision of a senior dentist [24]. Since this study was part of a larger study, the examiners were trained and calibrated before the start of …	A structured questionnaire was prepared to evaluate and record the oral hygiene practice, dietary habits and history of dental pain experience and dental visiting of the orphanage children (Additional file 1: Dental Questionnaire). The questionnaire comprised of 12 questions and was developed by the authors keeping in view the cultural context of the study. First two questions were about the indi…	Dental access					in care	4-17 yrs 72.1% male	not reported	not reported	See appendix 21 The overall caries prevalence was 34.8% and overall prevalence of PUFA/pufa was 15.9%. The mean score of DMFT and dmft was 1.18 (SD 0.39) and 1.04 (SD 0.23), and mean PUFA was 1.18 (SD 0.57) and mean pufa score 1.14 (SD 0.35). Untreated caries ratio was found to be 49.1% indicating half the decay had progressed to involve the pulp. No significant association of gender was found wi…		PUFA index can be used as an effective tool for evaluation of clinical consequences of untreated decay. When used in conjunction with DMFT index, it can provide valuable data for planning of preventive services and provision of treatment to those with urgent treatment needs. Initiation of oral health promotion programmes to train the faculty, staff and children residing in the orphanages, in oral…			The children had come to the orphanages at different ages and some even visit their relatives in vacations, this can also be attributed for presence of untreated decay as when children are away from the orphanage, their dietary and oral hygiene practices may differ [14].
Factors associated with the ability of the care system to meet the physical and mental health needs of young people looked after in England: a mixed-methods study	Kelly (2022)	What factors are associated with the ability of the care system to meet the physical and mental health needs of young people in care in England? Within this overarching question, the study sought to explore six sub-questions: 1. How can pre-care experiences and experiences of entering the care system affect the health development of young people in care? 84 2. What health-related information is c…		PhD thesis, mixed methods			England	Very high																						One young woman recalled not being taught to regularly brush her teeth and described how her birth mother had not led by example, All but one of the young people reflected on how they had not been taught how to brush their teeth and so they had entered care with significant dental neglect. One young woman spoke about how her birth mother had not taken her to the dentist or taught her to brush her…
Prevalence of dental caries and treatment needs among the orphan children and adolescents of Udaipur district, Rajasthan, India	Khare et al. (2012)	The study was to examine the prevalence of dental caries and treatment needs among the orphan children and adolescents of Udaipur district, Rajasthan, India.	Orphanage	Cross-sectional	N/A	from November 2009 to April 2010	India	Medium	All the available children and adolescents residing in the orphanages of Udaipur district formed the study population. Official permission and ethical clearance were taken and a written permission was obtained from the District Children Officer, Department of Social Justice and Empowerment, Udaipur.	Formal			Orphanage			883		Clinical exam Survey	WHO dentition status12 to assess the dental caries status and treatment needs of the study population. Before the start of the study, the examiner was standardized and calibrated in the department of public health dentistry, first by practicing the examination on a group of 10 subjects with a wide range of levels of disease conditions and then on 20 subjects twice on successive days. The intraexa…	, chewing and dietary habits		smoking, alcohol use				in care	7-18 yrs 76% male	Ethnic groups (%), Hindu= 96.4, Muslim=2.9, Sikh=0, Christian=0.7, Others=0	64% 1-3 yrs 30.6% 4-7 yrs 5.4% 8yrs or over	The information gathered regarding oral hygiene aids showed in Graph 1. Prevalence of dental caries in primary teeth was found to be 49.6% and in permanent teeth was 41%. A total of 2.6% of the subjects had permanent filled teeth. The participants having missing permanent teeth as a result of caries were found to be 4%. Percentage of inmates with fractured crown was 17.5% and 10.9% in primary and…		Death or abandonment of one or both the parents makes child a very poor ward of the community. And thus, orphaned children are especially vulnerable and thus potentially at an increased risk of poor health. Dental caries experience was low. The unmet needs for decayed teeth were also found to be high indicating a very poor accessibility and availability of any oral health care. Clearly, it can be…	Considering this distressed state of theirs and absence of a basic oral health care regime among the orphans, a special program should be developed to improve the dental awareness and the oral conditions of this population. It was intended that this study should assist in planning of the oral health care programs and establish a baseline for evaluation
Implementation of Oral Health Education to Orphan Children	Khedekar et al. (2015)	To determine the knowledge and oral hygiene status of orphanage children in Pune and changes in them after health education.	Orphanage	Intervention development	Not reported	April to June 2014	India	Medium	. Inclusion criteria were constituted for orphan children aged 5 - 12 years. Exclusion criteria were children suffering from acute or chronic systemic diseases, behavioral disorders, psychological problems, congenital abnormalities and those receiving medications.	Formal			Orphanage			100	Intervention in the form of oral health education was given to the orphans and their caretakers by audio-visual aids. Brushing technique demonstration and diet counselling were done. Caretakers were advised to supervise and reinforce the correct brushing technique in orphans. After 2 months, post-interventional intraoral examination of orphans' oral hygiene status was done.	Clinical exam Questionnaire	Intraoral examination was performed while the child was in sitting position, using torch light, autoclaved diagnostic instruments (mouth mirror, straight probe, periodontal probe, explorer) and personal protective barriers (gloves, head cap, face mask.) Baseline data were collected on oral hygiene, according to WHO recommendations comprising DMFS (Decayed, Missing, Filled Tooth Surfaces Index, fo…	Intervention in the form of oral health education was given to the orphans and their caretakers by audio-visual aids. Brushing technique demonstration and diet counselling were done. Caretakers were advised to supervise and reinforce the correct brushing technique in orphans. After 2 months, post-interventional intraoral examination of orphans' oral hygiene status was done						in care	5 - 12 yrs 50% male	not reported	not reported	The questionnaire revealed that orphans had various dental problems like improper oral hygiene practices and careless attitude towards dental health. Majority (59%) of the orphan children had experienced tooth ache, 98 (98%) of subjects did not visit the dentist, all the subjects used toothbrush and toothpaste to clean the teeth, 95 (95%) of subjects brushed once daily, 99 (99%) children replaced…		There was improvement in oral hygiene status in orphans due to educational intervention. Oral health education at the right age can help cultivate healthy oral hygiene practices in orphans which will benefit them for lifelong. Caretakers should be educated and trained about oral hygiene practices so that they can implement it and supervise the orphan children. Sensitizing the children with awaren…	Improvements in oral health sector are still required in developing countries, with the collaboration of professionals in healthcare services in preventive work as suggested by Petersen.17 Collaboration between general healthcare and oral healthcare has to be included in healthcare education programs.18 Dental colleges can organise camps for educating orphans and their caretakers. Various manufac…
Somatic assessments of 120 Swedish children taken into care reveal large unmet health and dental care needs	Kling et al. (2016)	This study examined the unmet health and dental care needs of Swedish children in foster and residential care.	Foster care and residential care	Cross-sectional study	N/A	N/A	Sweden	Very high	Convenience The selection of the sample was dependent on case workers accepting an offer of including a somatic health assessment of the child, as part of the services from the care provider. We have no information on why these children were referred to the project or why others were not. Children were admitted to the project over a 12-month period.	Formal			Foster/residential care			120		Clinical exam Interview	A brief assessment of the child's dental health status was included in the process, performed by the paediatrician, who had received one day of training from a child dental specialist							in care	0–17 yrs 58% male	Nine children were recent immigrants.	not reported	The dental examination mainly aimed to detect serious and untreated tooth decay and cavities and these were found in 29% of the preschool children and 50% of children aged 7–17. Six children with advanced tooth decay and cavities were scared of dentists and were referred to a paediatric dentistry specialist. For the remainder, case workers organised appointments at a dental clinic. The physical e…	The study has some obvious limitations. The regional sample consisted of a group of children entering OHC who were selected by the social workers for a somatic health assessment. We do not have access to information that enables us to assess whether the study group was representative of all children in the region that were placed in OHC during the period of observation. Thus, generalisations from…	Our study revealed a large unmet need for health and dental care interventions among children placed in foster care and residential care and a systematic strategy is required to address those needs	The rate of severe dental health problems was much higher than reported for children in the general population 23 and was often coupled with a fear of dentists. Providing dental care for children entering the child welfare system should be considered a priority. The results also accentuate the need for a large, preferably nationally representative, study similar to ours. As society will assume lo…
Oral health related quality of life among children with parents and those with no parents	Kumar et al. (2011)	: To compare the oral health related quality of life (OHRQoL) and caries status between school children living with their parents and orphan children, and to assess the factors that influence the oral health related quality of life	Orphanage	Cross-sectional	N/A	Not reported	India	Medium	Stratified Sampling frame comprised of 12-15 year old children attending two upper primary public schools and two special schools for orphan children at Udaipur, India. All the children present on the days of the survey were included and those unwilling	Formal			Orphanage			536 257 cases, 279 control		Clinical exam Questionnaire	clinical examination of each subject for caries status. DMFT index was used for caries assessment in accordance with WHO guidelines. A tooth was classified as carious when there was either a cavity, undermined enamel or a softened floor or wall or pit or fissure on one of the smooth surfaces. A plane mouth mirror and CPI probe was used for caries examination under adequate illumination. Intraexam…		dental visiting habits of each subject were recorded.	The OHRQOL instrument proposed by Jokovic et al., (2003) is a questionnaire of 31 items, describing problems that occur most frequently and cause the most bother to patients. It consists of four domains: oral symptoms, functional limitations, emotional well-being and social well-being, and, as with other quality of life measures, it assesses the frequency and impact of oral health problems in the…				in care	not reported	not reported	not reported	Appendix 45 Out of the total sample of 536 children 279 had parents and 257 were without. It was noted that the children without parents had poor scores for oral health related quality of life items (Table 1). The mean decayed com- ponent was found to be 1.33 in children with parents compared to 1.44 among those without parents; however this difference was insignificant. In relation to oral sympt…		In conclusion, oral health quality of life along with its domains differed significantly between the study groups. Furthermore, gender, dental visiting habits and caries status significantly influenced the oral health quality of life. Further studies on a larger representative sample could provide a clearer picture on the influence of various factors on oral health related quality of life.
Oral Hygiene Status and Gingival Status of the 12- to 15-year-old Orphanage Children Residing in Delhi State: A Cross-sectional Study	Kumari et al. (2021)	To assess oral hygiene status and practices among 12- to 15-year-old orphanage children in Delhi State, India.	Orphanage	Cross-sectional	N/A	Not reported	India	Medium	one-stage cluster sampling design	Formal			Orphanage			900		Clinical exam Structured interview	The clinical examination of all the study subjects was done by a single examiner who was trained and calibrated in the Department of Public Health Dentistry. The intra-examiner variability was checked by performing the repeat examination of 10% randomly selected subjects and intra-examiner reliability was assessed using kappa statistics. The kappa values ranged from 0.78 to 0.83 for oral hygiene …	. A structured interview was conducted to collect information on oral hygiene practices (frequency, method of cleaning teeth, type of material used) of the study population.						in care	12-15yrs 69.6% male	not reported	not reported	See Appendix 22 The majority of the orphanage children had good oral hygiene status (53.8%) followed by fair (32.3%) and poor (13.9%) oral hygiene status. A large proportion (48.3%) of the orphanage children had mild gingival status followed by moderate (34.9%) and severe (16.8%) gingival status. No statistical difference was reported for the distribution of oral hygiene status and gingival score…	The level of awareness of the caretakers (who spent most of the time of the day with them) toward oral health was not assessed. This could be a limitation as they can guide this special group well toward the maintenance of good oral hygiene.	Good oral hygiene index scores were found to be more among the 13-year age-group and poor was reported to be more among the 12- and 15-year age-group. Though, there was not much difference in the oral hygiene status across the age-groups. Females had better oral hygiene status and gingival status than males.	It is well known that there are threats to oral health across the lifespan. Regular orphanage-based programs of dental health education should be implemented and reinforced in this group along with their caretakers. The instructions to clean their teeth two times a day and oral hygiene should be practiced under the supervision of the caretaker.
"Tower Hamlets Council: “Let’s talk about teeth” project Case study in Healthy futures Supporting and promoting the health needs of looked after children"	Local Government Association (2016)	The “Let’s talk about teeth” research project in 2014/15 assessed the dental health needs of looked after children in Tower Hamlets, and explored foster carers’ dental health attitudes, knowledge, behaviours and experiences of looking after children’s dental health and care.		Health Report			England	Very high																						• 36 per cent of five to 11 year-olds had experienced tooth decay in their primary (baby) teeth; 9 per cent had had a primary tooth extracted because of decay • 19 per cent of 12 to 15 year-olds had had one or more untreated decayed permanent tooth • 27 per cent of 12 to 15 year-olds had had a permanent tooth extracted because of decay • 12 to 15 year-old looked after children in Tower Hamlets ha…
Effectiveness of a Motivation and Practical Skills Development Methods on the Oral Hygiene of Orphans Children in Kaunas, Lithuania	Markeviciute, G. and Narbutaite, J. (2015)	The aim of this study was to evaluate the effect of a motivation and practical skills development methods on the oral hygiene of orphans.		Intervention development	Unclear	3 month	Lithuania	Very high	Purposive	formal			Care homes			68	See appendix 24	Clinical exam Questionnaire	For both groups participants, a similar clinical plaque accumulation examination was conducted at baseline and at the study end, using a dental mirror, a sterile probe, and a portable dental equipment lamp in the health office at the care home before lunch. Recordings on plaque accumulation were performed based on a plaque index (PLI) [14]. Four gingival areas (distal, facial, mesial and lingual)…	Children were asked to complete a self-administered questionnaire at the baseline and at the study end. Response rate was 100% and 79%, respectively. Questionnaire inquired about oral hygiene habits, self-perception, dental attendance, dietary habits. At baseline, 19 item questionnaire was used to assess the oral hygiene knowledge and practices and at the end 21. Two questions were added in order…	Dental attendance					in care	7-17 yrs	not reported	not reported	See appendix 24 All children had a plaque on at least one tooth in both groups: motivation 1.14 (SD 0.51), practical application 1.08 (SD 0.4) (P = 0.58). Girls in both groups showed significantly better oral hygiene than boys (P < 0.001). After 3 months educational program oral hygiene status improved in both groups significantly 0.4 (SD 0.35) (P < 0.001). Significantly better oral hygiene was d…		Educational programmes are effective to improve the oral hygiene, especially when they’re based on practical skills training.	It is safe to say that kids need more than 3 months to absorb information and change attitude. It is also clear that there was a lack of motivation in practice group for kids to change their mindset. It is stated, that practical teaching without motivation may be short-termed [13]. Thereof, we may guess that improvement of oral hygiene in motivation group, despite being less visible, may have lon…
Mind your Health-The Physical and Mental Health of Looked After Children and Young People in Northern Ireland.	McSherry (2016)	This study aimed to compile a profile of the health of a representative sample of LACYP in Northern Ireland (10% of population), and use this to explore how the care system is meeting their needs, as well as what helps and hinders the implementation of initiatives designed to improve their health.		Health Report			Northern Ireland	Very high																						Dental health problems were also quite common, or had been an issue at the start of the placement (16%). These problems were often blamed on the unhealthy diets that children had followed prior to the placement and having never acquired the habit of brushing their teeth regularly. [Child’s] dental health is important because they were never taught to brush their teeth. Have had a lot of problems …
Oral health status among orphan and non-orphan children in Mashhad: a case-control study	Meshki et al. (2022)	This study aimed to compare caries and oral hygiene status among orphan and non-orphan children.		cross sectional	N/A	N/A	Iran	high		formal			Orphanage			222 orphan 222 control	N/A	Clinical exam	The status of teeth caries was recorded by World Health Organization (WHO) criteria including the indices of Decayed, Missing, Filled Teeth/Surfaces (DMFT/DMFS) for the permanent teeth and the decayed, missing and filled teeth/surfaces (dmft/dmfs) for the primary teeth [13]. The oral hygiene status was recorded using the oral hygiene index (OHI-S), described by Vermillion and Greene [14]. The val…							in care	7–12 years 61.7% of orphan children were girls, and 38.3% were boys. In the non-orphan group, 58.1% of the participants were girls, and 41.9% were boys.			See appendix 48 mean DMFT was 3.36 in orphan children and 2.10 in non-orphan children, which was not statistically significant (p=0.6). The mean dmft was 9.01 in the orphan group and 5.26 in the non-orphan group, which was statistically significant (p=0.003). The next index examined was the OHI-S index. The average OHI-S index was 2.30 in the group of orphan children and 1.05 in the other group, …		Due to the higher prevalence and severity of the decay of deciduous teeth in children living in orphanages and their unfavorable oral health, there is a clear need for planning and policy-making to promote the oral health of these children.
Oral and Dental Health Status in Orphan Children of Lucknow	Mohan et al. (2014)	This study hereby aims to compare the oral and dental health status of children living in orphanages and children living with their families		Cross sectional	N/A	Not reported	India	Medium	Purposive	Formal			Orphanage			80 CiC 80 control	N/A	Clinical exam	The hard and soft tissues were extensively examined. All intraoral examinations were done using diagnostic instruments like mouth mirror, explorer and natural illumination after making the subject to sit comfortably on a chair. The instruments were disinfected using antiseptic solution. Photographs were taken when and where necessary. Clinical diagnostic criteria proposed by World Health Organiza…							In care	5-14 yrs 43.7 % male	not reported	not reported	See Appendix 25 About 45.0 percent male children living in orphanages were found to be suffering from dental caries while it was 25.0 percent among school children, similarly 25.0 percent male children of orphanages were without clinical finding while among school children it was 61.5 percent. Among female school children 45.0 percent were without clinical finding while it was 7.3 percent in orph…		In a study of Udaipur district dental caries in primary teeth was found to be 49.6% and in permanent teeth was 41. [9] The study concluded that this community has experienced a low utilization of preventive or therapeutic oral health services which in accordance with the findings of present study where also the dental caries was found to maximum among orphan children. This can be related to the f…
Meeting the primary care needs of young people in residential care	Moeller-Saxone (2016)	The objective of this article is to describe the factors that contribute to the health needs of young people in out-of-home care and the tools available to support general practitioners (GPs) to provide care.		Commentary			Australia	Very high																						Dental Half of Australian children entering out-of-home care have dental problems10
Looked after children: a study to inform revision of the 2002 guidance.	Mooney (2009)			Health Report			England	Very high																						The most prevalent medical condition was overweight or obesity (35%, rising to almost two thirds of the adolescent group), followed by dental problems (22%)
Dental Status and Treatment Needs of Children in Foster Care	Moron et al. (2019)	to compare the dental status and treatment needs of children in foster care with other children enrolled in Florida Medicaid.		Cross sectional	N/A	January 2016 to December 2016.	USA	Very high	Purposive	Formal					unclear	548 in care 548 control	N/A	Clinical records	The following data were abstracted from the electronic dental records of children in both groups: age; sex; race/ethnicity; date of birth; date(s) of dental visits; number of decayed, missing, or filled permanent and primary teeth (DMFT/dmft); chief com­ plaint(s); diagnosis of pulpitis; diagnosis of severe gingivitis; periodontal diagnosis; number of treatment-planned restora­ tions; number of t…							In care	2-18 yrs Approx 50% male	non-Hispanic black or African American children accounting for the largest proportion of the foster care group (62.4 per­ cent) and Hispanic children comprising the largest proportion in the non-foster care group (55.7 percent).	not reported	See Appendix 26 Compared with Medicaid-enrolled children who were not in foster care, those in foster care were significantly more likely to have more than one dental visit during the study period (P=0.004; Table 1). Among two- to five-year-olds, 36.2 percent in foster care and 27.5 percent in the comparison group had experienced dental caries in their primary dentition, a difference that was nor…		The potential social and financial consequences of poor of health among children in foster care may include frequent visits to hospital emergency departments (often without definitive resolution of the presenting problem) and hospital inpatient admissions as well as treatment provided in operating rooms for conditions that were largely preventable or were amenable to less cosdy care had they been…	Studies examining the dental status and treatment needs of children in foster care are extremely limited. Further studies are required to assess dental caries stacus among foster care children by the inclusion of factors such as sugar consumption, oral hy­ giene practices, fluoride exposure, and socioeconomic factors that play an important role in caries development. We also need research on effe…
How do foster carers manage the oral health of children in foster care? A qualitative study	Muirhead (2017)	This qualitative study aimed to tackle this important research gap byaddressing three research questions: (i) how does the foster family envi-ronment influence the oral health of foster children; (ii) what knowledgeand attitudes did foster carers have about children’soralhealth;and(iii)what were foster carers’experiences of managing their foster children’soral health behaviours and dental care?		Qualitative			England	Very high								12 foster carers	N/A	Qualitative focus groups	Foster carers oral health caregiving role											Foster carers saw the oral health caregiving role as an integral part of being foster carers, looking after their children's physical, social and emotional well-being. Carers were often hypervigilant about monitoring their children's toothbrushing routines. Foster carers had positive oral health attitudes and were knowledgable about the causes and consequences of poor oral health. Tensions betwee…
Comprehensive dental health care program at an orphanage in Nellore district of Andhra Pradesh	Muralidharan et al. (2012)	To improve the oral health status of children at an institute in Nellore district of Andhra Pradesh, India, through prevention based comprehensive dental health care program (CDHP).		A longitudinal interventional study	unclear	initiated from July 2008 and evaluation being performed after 18 months.	India	Medium	Purposive voluntary informed consent was obtained from the Director of the Orphanage	Formal			Orphanage			162	The CDHP included An assessment of oral health knowledge and awareness using a specially designed pretested 15 item questionnaire. Group based health education to all children. The children were divided into two groups based on their level of comprehension - one group comprising of lower and upper kindergarten (UKG) and grade I and a second group comprising of grades II, III, IV, and V. A total o…	Clinical exam Questionnaire	baseline assessment of the dentition status and treatment needs according to WHO 1997 criteria. [7] Two investigators were trained and calibrated in recording baseline data in the Department of Public Health Dentistry. The related kappa value showed fair to good agreement between the investigators (kappa = 0.71). The data was analyzed and subsequently a CDHP was instituted for the children of the…	i. An assessment of oral health knowledge and awareness using a specially designed pretested 15 item questionnaire. ii. Group based health education to all children. The children were divided into two groups based on their level of comprehension - one group comprising of lower and upper kindergarten (UKG) and grade I and a second group comprising of grades II, III, IV, and V. A total of eight ses…	Professional oral prophylaxis for all the children. Weekly mouth rinsing program using 0.2% sodium fluoride. Biannual application of topical fluoride solutions (1.23% APF). Pit and fissure sealants placement for all first permanent molar teeth. Provision of all necessary curative services which included restorations, pulp therapy and extractions					In care	5-10 yrs boy to girl ratio of 1.6:1	not reported	not reported	See Appendix 28 There were a total of 221 children in the orphanage with a boy to girl ratio of 1.6:1. The initial questionnaire revealed poor oral health knowledge and awareness in majority of the children. Sixty seven percent of children were not aware of the causes of dental decay and periodontal disease. The number of children having dental caries at baseline was 129 (58.37%) with a mean DMFT…	The lack of control group can be considered as a limitation of this study. However, since the study group comprised of disadvantaged children, it was not considered ethical to further create a group who would not receive oral health care. Our results cannot be generalized to the whole population of Indian children since the study group comprises of a high risk group of disadvantaged children of a…	To conclude, the results of this study show that the CDHP is effective in reducing the number of children developing new caries lesions. The low BMI in children with caries at baseline showed improvement reflecting the effect of the program on general health. For maximum benefits, continuous and periodic evaluation of such programs is essential. In resource limited countries like India, innovativ…
The oral hygiene status of institution dwelling orphans in Benin City, Nigeria	Ojahanon et al. (2013)	To determine the oral hygiene status of institution dwelling orphans, and to recommend measures/strategies aimed at improving oral hygiene in order to minimize the development and progression of periodontal diseases in this group.		prospective study	N/A	Not reported	Nigeria	Low	Purposive	formal			Orphanages			38	N/a	Clinical exam Open ended questionnaire	The simplified oral hygiene index (Greene and vermillion 1964) [12] was used to evaluate the clinical level of oral hygiene. The oral hygiene index score involves the examination of six tooth surfaces (all four permanent first molars and the upper right and lower left central incisors) representing the anterior and posterior segments of the mouth and only the tooth surfaces covered with plaque or…	Interviewer administered, open-ended questionnaires were administered to obtain their bio-data, attitude and knowledge of oral health care						in care	6-17 years Approx 45% male	not reported	not reported	See Appendix 30 Initially 55 orphans were seen but only 38 of them comprising of 21 females and 17 males all aged 6-17 years were clinically examined [Table 1]. The clinical level of oral hygiene was fair in 28 (73.7%), poor in 8 (21.1%) and good in 2 (5.3%) of the orphans [Table 2]. About sixty eight percent of those with fair oral hygiene status were aged 6-9 years, while the remaining 6 and 3 …		The oral hygiene status of most of the orphans examined was fair due largely to their poor knowledge of oral health care and limited availability of materials for the maintenance of proper oral hygiene. Their caregivers need adequate materials and updating of their knowledge of oral health care to ensure appropriate supervision. Creating opportunities for the orphans to visit dental health facili…
Health status and infectious diseases in male unaccompanied immigrant minors from Africa in Spain	Olivan-Gonzalvo, G. (2021)	The aim was to examine the health status and infectious diseases in a cohort of unaccompanied immigrant minors (UIMs) from Africa in Spain, and to detect if there are differences according to the geographical area of origin.		Cross-sectional study	N/A	2005-2019	Spain	Very high	purposive	Formal			residential care		unclear	622	N/A	Clinical exam	Management of detected health problems. All the children were evaluated in the specialized unit in UIMs of the pediatrics and adolescence service of the Social Services Institute of Aragón. The UIMs with dental, infectious, ophthalmologic, ENT, orthopedic and cardiovascular pathologies were referred to specialized units for their treatment and control.							in care	13-17 yrs 100% male	8.9% (n = 534) were of Maghreb origin (Morocco, 476; Algeria, 58), with a mean age of 15.9 years (SD 1.5; range 13-17). The remaining 14.1% (n = 88) were of Western Sub-Saharan origin (Ghana, 26; Mali, 17; Guinea Conakry, 17; Senegal, 10; Gambia, 8; Sierra Leone, 3; Liberia, 2; Guinea Bissau, 2; Ivory Coast, 1; Nigeria 1; Burkina Faso, 1), with a mean age of 16.8 years (SD 1; range 14-17).	not reported	See Appendix 31	We consider that the present study has some limitations. First, the African UIMs included in our study were evaluated after arrival in Aragon, an inland region located in the northeast of Spain, so it is possible that they are not a completely representative sample of all the African UIMs that arrive in Spain. Secondly, the stool parasite investigation was performed only in the UIMs that presente…		In the context of UIMs, World Health Organization guidelines recommend targeted screening, preventative vaccination programs, integration into the local health-care systems allowing for long-term treatment and follow-up, and the diffusion of national educational campaigns as a form of HBV infection transmission prevention
The oral and dental status of children residing in a Romanian orphanage	O'Sullivan et al. (1997)	aimed to assess the dental status and needs of the children in the orphanage as well as carrying out any basic emergency treatment for pain.		Cross sectional	N/A	1991-08-01	Romania	Very high	purposive	Formal			Orphanage			458	N/A	Clinical exam	The examina­ tions were carried out in the dormitories using a disposable mirror and the available light source (daylight or the strip lighting in the rooms). The methods and criteria advocated by W.H.O. were used [l]; dmft for the whole mouth was recorded for children under 5 years of age, dmft of primary molars only for children between 5 and 9 years, and DMFT of all erupted permanent teeth for…							In care	2 -16 years 55% male	not reported	not reported	The majority of the children were caries free, 97% of the children under 6 years of age having a dmft of zero and 88% of the children between the ages of 6 and 9 years having no visible caries of the primary molars. In the permanent dentition of children over the age of 6 a DMFT of zero was found in 86% of the children. In the children with caries the lesions were often multiple, with as many as …		The results of this study enabled an overall view of the dental status and oral care in the orphanage to be documented, so that future preventive work could be planned. The results showed that, in general, caries experience was low but that the prevalence of gingivitis and fractured teeth was high. Dental health care for these children needs to be aimed at oral hygiene and prevention of period­ o…
Impact of oral diseases on daily activities among 12- to 15-year-old institutionalized orphan and non-orphan children in Bengaluru city: A cross-sectional analytical study	Pavithran et al. (2020)	to assess and compare the oral health status and impact of oral diseases on daily activities among 12- to 15-year-old institutionalized orphan and non-orphan children in Bengaluru city.		Cross-sectional study	N/A	Not reported	India	Medium	The study considered the entire orphan and non-orphan children in city as the sampling frame	Formal			Orphanage			420	N/A	Clinical exam Questionnaire	The second part consisted of WHO Oral Health Assessment Form 1997 used to assess the oral health status of the subjects			self assessment of oral health and self-percieved oral problems The assessment form consisted of two parts. The first part consisted of demographic information and pretested C-OIDP index[6],[14] used to assess the impacts of oral diseases on daily activities of study subjects, through guided interviews, considering eight common daily activities. Each child was asked whether he or she had faced an…				In care	12-15 yrs 51% male	Not reported	Not reported	See Appendix 32 In the interview using C-OIDP index, 76.7% of orphans and 65.7% of non-orphans answered “Yes”; 23.3% of orphans and 34.3% of non-orphans answered “No” to the question “In the past three months, did you have any problem in your mouth or teeth?”. The commonly perceived oral problems by study subjects were bleeding gums, toothache, tooth position, and bad breath [Table 1]. A high pre…	As simple random sampling was used to select subjects from neighboring schools, gender could not be matched accurately. However, orphans and non-orphans were completely matched for age and other sociodemographic characteristics such as area of residence or orphanage and school type, which is a positive representation. As this study includes questionnaire to collect information on the impact of or…	The C-OIDP score was high in orphans. Age, dental fluorosis, and decayed teeth were the significant factors for C-OIDP score, that is, older age subjects and children with dental fluorosis and decayed teeth had higher effect of these oral impacts on their daily activities. More than half of the study subjects were suffering from oral diseases which required attention to prevent further disabiliti…	Hence in future, longitudinal studies are needed to assess the perceptions of OHRQoL among orphans and non-orphans over time. Health education programs must be conducted targeting primary caregivers and supporting staff of orphanages to create awareness of the prominence of oral healthcare and its role in OHRQoL of an individual Staff in orphanages ought to be trained by dentists to help the chil…
Addressing the well-being of Aboriginal children in out-of-home care: Are we there yet?	Raman et al. (2011)	We wanted to evaluate the multidisciplinary clinic and its outcomes using a mixed methods approach. We aimed to document the health and well-being of Aboriginal children entering OOHC placed with KARI, to identify characteristics of children in care who were doing well and who improved in care. We also wanted to identify enablers and barriers to appropriate health, developmental services and educ…		Mixed methods evaluation	Unclear	N/A	Australia	Very high	We reviewed all clinical data collected on the first 100 children seen by the KARI clinic			Unclear			KARI Aboriginal Resources Inc. is a non-governmental organisation that provides foster care services to Aboriginal children and young people from SWS referred by DoCS.	99	Children in out-of-home care (OOHC) have well-documented health and developmental needs. In Australia, Aboriginal children have significantly worse health outcomes than non-Aboriginal children. We wanted to identify the health and well-being of Aboriginal children entering OOHC, placed with an Aboriginal organisation, who accessed a specialised multidisciplinary clinic in south-western Sydney. We…	Retrospective chart/register review				Information was collated on clinic outcomes – health, developmental and behavioural problems identified, strengths documented, treatment and recommendations.	Unknown	unknown	health clinicians, KARI staff and DoCS caseworkers, and agency managers from health and DoCS.	in care	0-12.5 yrs 54% male	Aboriginal	not reported	See appendix 12 36% identified wih dental problems. Of the children identified with dental concerns, all had early childhood caries; four needed urgent dental extraction because of pain and/or abscess. A recurring theme in the interviews was the fact that the clinic had been running on goodwill alone and was under-resourced since its establishment. Interviewees also mentioned the need for the cli…		Our study suggests that Aboriginal children in OOHC have a similar range of health, developmental and psychosocial problems as other children in care. These needs are exacerbated because of the significant burden of social disadvantage faced by urban indigenous families such that Aboriginal children in our cohort had worse immunisation uptakes and other indicators of risk. While the developmental…	Comprehensive, multidisciplinary assessments of children early in their placement can identify health and developmental problems, and facilitate appropriate early intervention. However, identification alone is not enough; multi-agency partnerships working together and building on each other's strengths need to tackle the identified systemic barriers to intervention and care faced by these childre…
Health of Southern Tasmanian 4- to 6-year-old children in out-of-home care compared to peers	Rauter et al. (2018)	To compare the health of 4- to 6-year-old children in out-of-home care (OOHC) in Southern Tasmania with their peers.		Cross-sectional study	N/A	August 2011 to January 2012.	Australia	Very high	Purposive	Formal					Mixed- foster care, kinship care, biological parents, third party guardianship	109 comparison with peers (n=?)	N/A	Clinical exam	An Oral Health Tasmania dental hygienist/dentist did oral health assessments either at the time of paediatric assessment or in a separate appointment.							in care	4-6 53% males (n=59)	Indigenous N=22 (21%)	Average time in care 38 months (range 0-76)	dental caries (61% vs. 45% Tasmanian children) were all higher than peers	This study examined a small age range of children and thus cannot represent all children in OOHC in Tasmania. Comparison data available for this age group were from multiple different sources, and this may have affected the reliability of the comparisons.	Improved preventative health could be facilitated by better information systems, health education of carers and regular dental care. Despite being in OOHC for on average of 3 years there were many unrecognised health needs in the study cohort. When compared to Tasmanian and Australian peers these needs were often higher. High hepatitis C exposure in utero and two children found to be hepatitis C-…
Dental Treatment Needs among Children and Adolescents Residing in an Ugandan Orphanage	Rubin et al. (2016)	To assess overall dental treatment needs of children living in an orphanage in Uganda.		Cross sectional	N/A	Not reported	Uganda	Low	purposive	Formal			Orphanage			153	N/A	Clinical exam	The dental student provided instructions on oral and dental health care to all the children. Each resident received a toothbrush and a tube of toothpaste, and the dental examination was carried out after the participants brushed their teeth. Oral and dental examina- tions were carried out using disposable dental mirrors and sterile cotton rolls under natural sunlight or flashlight. A tooth was co…							In care	5-17 yrs Approx 30% male	Not reported	Not reported	See Appendix 33 Most of the primary teeth (64%) required no dental treatment, but almost all (98%) of the permanent teeth did. A mean (±standard deviation) of 4.81±1.92 permanent teeth required treatment. The mean number of missing teeth was 0.47. Thirty-one children (20.2%) had crowding, 52 (34%) had calculus, and 49 (32%) had signs of attrition on primary and permanent molar teeth (45 enamel on…	Several limitations of this study bear mention. The participants were all residents of one geographical location. In addition, we did not differentiate between the various types of required interventions (restorative treatment, extraction, endodontic treatment or pit and fissure sealants), but rather reported treatment needs as a whole	In conclusion, the majority of the studied Ugandan children with primary teeth (64%) did not need any dental treatment in contrast to the vast majority of children and adolescents with permanent teeth who did (98%). The treatment needs for the permanent teeth of our participants was much higher than those for the primary teeth (4.81 and 0.30, respectively).
Children in out-of-home care are at high risk of somatic, dental and mental ill health	Randsalu et al. (2018)	to evaluate the medical records of all systematic CNIF health assessments performed by paediatricians in Skåne from 2012 to 2015. The specific goals were to analyse the health of children in out-of-home care and to determine the value of systematic health assessments that were introduced into the province in 2012 for this group of children.		Evaluation	Not reported	2012 to 2015.	Sweden	Very high	Purposive	voluntary (74%) and compulsory (26%) out-of-home care			out of home care		unreported	239	In Skåne, the municipal social services are responsible for referring a child for a CNIF health assessment, including an examination by a physician. Such assessments may be requested by social services before a child is assigned to a voluntary placement in out-of-home care and should be requested prior to the compulsory form of placement The medical records contained accumulated information since…	Retrospective chart/register review	dental health		missed dental appointments					in care	Pre-school/school age 50% male	Approximately, half (53%) of the children were foreign born or had at least one foreign-born parent.		See Appendix 34 During the study period, only 409 (6%) of the 11 413 children in voluntary (74%) and compulsory (26%) out-of home care were referred by social services for a systematic CNIF health assessment and clinical examination Poor dental health: Yes- 125 (30%), No- 253 (62%), Missing- 31 (8%) Non-attendance at child health and dental health programmes was seen in 39 and 36%, respectively, …	A weakness of the present study was that it did not include children in out-of-home care who were referred to a general practitioner for a systematic CNIF health assessment at any of the primary care centres in the province. However, 73–87% of the systematic health assessments in Skåne between 2012 and 2015 were performed at the paediatrics departments in the province and, therefore, we consider …	We conducted a regional evaluation of the Swedish national health assessments of children in out-of-home care in the first four years after their introduction to the province of Skåne in 2012. The results revealed a large unmet need for healthcare interventions for all the studied children, regardless of whether their placement was voluntary or compulsory (Table 4). During the four-year study per…	We recommend that, in line with several other countries, Sweden should make health assessments a statutory and integrated component of welfare evaluations for all children in out-of-home care, regardless of the type of placement. Effective safeguarding of these vulnerable children can only be achieved if all individual actors and agencies play their full part.
Oral health perceptions and practices of caregivers at children's religious schools and foster care centers: a qualitative exploratory study in Lahore, Pakistan	Saleem et al. (2022)	to explore the perceptions and practices of caregivers in Lahore, Pakistan, at the children's foster care centres and religious schools in managing children’s oral health.		qualitative ethnomethodological approach	N/A	N/A	Pakistan	Medium		formal					“Madrasa” (Religious Schools)	28 caregivers	N/A	Focu groups		preexisting traditional personal knowledge of the caregivers determine children’s oral health, use of religio-cultural driven and convenience-based oral hygiene practices		development of the desired living environment and responsibilities of the caregivers, ethnomedicine, spiritual healing, and self-medication.	23 to 50 years for both males and females		Care givers in two foster care homes and three religious schools					See Appendix 47	This study had the limitations of a small sample size focusing on only a few centres in one city.	This qualitative study concludes that the oral health of the children at care centres and religious schools depends upon the personal reasoning and preexisting religio-cultural knowledge of the caregivers rather than on specialized oral health-oriented approaches. The caregivers at foster care centres were more involved in supervising the children to maintain oral hygiene and oral health compared…	The findings of this study recommend using a mixed-method approach to evaluate the thematic findings with the clinical examination of the children. The awareness of caregivers can be improved by arranging seminars, training sessions, and workshops to train them to work with under-care children at foster care centres and religious or other boarding schools.
A school-based epidemiological study of dental neglect among adolescents in a deprived area of the UK	Sarri et al. (2012)	To assess the prevalence of two types of dental neglect (DN) for adolescents attending secondary schools in a deprived inner city area: neglect of the prevention of oral disease (DPN) and neglect of dental treatment (DTN)		a longitudinal school-based epidemiological study		used follow up data from a 4 year intervention	UK	Very high	representative random sample	formal					unclear/unrported	965		Clinical exam Questionnaire.	Data collection was performed in school classrooms and included an oral exami‑ nation and the adolescent’s supervised answers to a self-completed questionnaire. Diagnosis of tooth condition was visual and no radiographs were taken. Dental caries was recorded by tooth, following WHO criteria.18 TDIs were recorded according to the classifica‑ tion described by Glendor et al. (2006)19, which is simi…		answers regarding experience of dental pain and last dental visit					in care	15-16 yrs 43.6% male	not reported	not reported	One in two LAC in the study was found to expe‑ rience DPN: 51.7% of them experienced dental caries, 10% TDIs and 12.5% dental pain (Table 1, Fig. 2) As with DPN, a higher proportion of LAC (64.7%) and refugee adolescents (58.3%) experienced DTN compared to adolescents living with their families (44.2%) and nonrefugee adolescents (44.9%). However, FSM (free school meals) eligibility was not a disc…	There are two potential weaknesses in this study. Firstly, the cross-sectional study design adopted did not enable causality to be established. Secondly, assessment of two other dental conditions (dental erosion and orthodontic treatment needs) together with an oral health quality of life measure of adolescents’ perceived need for dental treatment would ideally provide additional information abou…	We found that four out of ten adoles‑ cents in the sample experienced DPN and five out of ten DTN. For the sample of ado‑ lescents who lived in a deprived and mul‑ ticultural area, the following groups had a higher risk of experiencing DPN: those who had SEN but were without statements; refugees; or those who were LAC. A higher proportion of refugee and LAC adolescents were also found to experien…	Public dental health interven‑ tions to address DN may be more relevant for deprived adolescents whose dental needs are at greater risk of neglect than for adolescents across the population as a whole. Finally, as DN may overlap with other types of child neglect, resources could be more efficiently allocated.	Although this descriptive study pro‑ vides some interesting information in an area of research that is becoming highly relevant, further research is necessary to address questions which have not been answered here.
Oral health needs among youth with a history of foster care: A population-based study	Sarvas et al. (2021)	The goal of this study was to compare the self-reported oral health needs and access to dental care among youth who have and have not experienced foster care. We hypothesized that youth with a history of foster care would fare worse than their peers with no history of foster care on all indicators. Specifically, we anticipated that youth with a history of foster care would self-report more oral h…		Cross-sectional study	N/a	Not reported	USA	Very high	purposive (secondary data analysis)			Unclear			unclear/unrported	4,696 foster care 150,078 control	N/A	Questionnaire	Youth were asked whether or not they had experienced five types of dental problems in the past 12 months: 1) toothaches or pain; 2) decayed teeth or cavities; 3) swollen, painful, or bleeding gums; 4) could not eat certain foods because of a dental problem; 5) missed one or more school days because of a dental problem.		If youth endorsed any dental problems, they were then asked, “Have you had this dental problem treated by a dentist?” Three response options were recoded into a binary variable where 1 = “Yes” and 0 = “No, but I will see a dentist” or “No, I am unable to see a dentist.” Finally, youth were asked about routine dental care: “When was the last time you saw a dentist for a check-up, exam, or teeth cl…					History of foster care	10-16 yrs Approx 50% male			See Appendix 35 Participants included 4,696 (3%) youth who reported a history of foster care and 150,078 (97%) youth who reported no experience in foster care. Missing data across all variables was low. In particular, foster care history had 8.7% missing values, and dental health variables ranged from 3.5% to 4.6% missing. Youth with a history of foster care were more likely to be from racial and…	The current study has a number of strengths including the large sample size and youths’ self-reports of their oral health. However, several limitations should be considered. Self-report of oral health issues provides important first-hand information, including obtaining youths’ own perspectives regarding their oral health. Self-reporting however may inadvertently over-report visible cosmetic conc…	To our knowledge, this study is the first in the United States to survey youth with a history of foster care about their oral health care needs. We found that compared to their peers, youth with a history of foster care have self-identified dental needs, including issues with pain, and they have less access to a dentist to address these needs.		Future research with larger samples and more nuanced measures of foster care history are needed to determine the potential modifiable barriers to accessing dental care for youth with a history of foster care
Temporomandibular disorders and oral parafunction in children living with their parents and children living in institutional protective care: a comparative study	Sermet Elbay et al. (2017)	the aim of the present study was: (i) to identify and compare the prevalence of the signs and symptoms of TMD and oral parafunctions in children living in child-protection institutions (CLCPI) with children living with their parents (CLWP); (ii) to determine whether oral parafunctions in either group of children are associated with signs and symptoms of TMD; and (iii) to examine the possible impa…		Cross-sectional study	N/A	not reported	Turkey	very high	purposive	Formal			child-protection institutions (CLCPI)			CLCPI, n = 184; CLWP, n = 201).	N/A	Clinical exam Questionnaire	Clinical examination for signs of TMD included the following: Joint sounds. ‘Clicking’ (i.e. a single sound with a short duration) and ‘crepitation’ (i.e. multiple, grating sounds) that were clearly audible or could be felt by placing the fingertips over the lateral surface of the joint during mouth opening and closing. Joint tenderness. TMJ tenderness was identified by bilateral palpation of the…							In care	8-18 yrs	Not reported	Not reported	See appendix 36		The results of this study demonstrate that institutionalised children present with a higher prevalence of TMD signs and symptoms and oral parafunctions than do children who live with their parents, and they also present with a more positive association between TMD-related symptoms and stressful life events and oral parafunctions.		additional long-term comparative studies are needed to confirm the results reported here.
Dental Caries Status of Institutionalized Orphan Children from Jammu and Kashmir, India	Shah et al. (2016)	This study was carried out with the aim to assess the dental caries status of institutionalized orphan children from Jammu and Kashmir.		descriptive cross sectional	N/A	Not reported	India	Medium	purposive	Formal			Orphanage			1,375	N/A	Clinical exam Questionnaire	decayed, extracted, filled teeth (deft)/ decayed, extracted, filled surface (defs) and decayed, missing, and filled teeth (DMFT)/decayed, missing, and filled surface (DMFS) indices were used to assess the caries status of primary and permanent dentition. Multiple choice, close-ended questionnaires were administered to assess the oral hygiene habits, knowledge, and dietary behavior of orphan child…	Multiple choice, close-ended questionnaires were administered to assess the oral hygiene habits, oral health knowledge, and dietary behavior of all orphan children prior to examination. The questions were adopted from Al-Omiri et al11 and were originally designed in English and then translated into the local language.						In care	≤6 -≥ 12 yrs Approx 70% male	Not reported	Not reported	See Appendix 37 Results showed that caries prevalence in primary dentition was higher in subjects’ ≤6 years of age where the prevalence was 50.9%; in subjects 7 to 11 years of age, the prevalence was 25.2%. Caries prevalence in permanent dentition within the age group 7 to 11 was 69.1%, while in subjects’ ≥12 years, the prevalence was 66.2%. Use of toothbrush was the most prevalent method of clea…	The data collected for habits and practices may have certain limitations. With regard to oral hygiene habits and practices and frequency of dental visits, courtesy bias and overreporting have to be assumed, whereas for the consumption of sugary foods and drinks, we assume a central tendency bias and may have been probably under-reported. In addition, recall bias and social desirability bias could…	It can be concluded that conditions and experiences early in life leave an indelible imprint on the individual. The negative impact of institutionalization on a young growing person and nonrecognition of the child as a “person” and “rights holder” have enormous impact on the development of children. The results of the present study show that the caries level in orphan children studied is more tha…	These extensive unmet dental needs of this socially disabled strata should be promptly met by the health care providers to facilitate better health in these deprived children. In order to improve the dental health status of this underprivileged orphan population, based on our results, we propose that a preventive program can be planned and implemented on these factors: (A) In general, we should c…
Clinical consequences of untreated dental caries evaluated using PUFA index in orphanage children from India	Shanbhog et al. (2013)	To determine the prevalence and severity of oral condition related to untreated dental caries with PUFA index and to relate period of institutional stay, oral hygiene practice and diet of orphan children to caries experience ratio.		Cross-sectional	N/A	Not reported	India	Medium	purposive	Formal			Orphanages			488	N/A	Clinical exam Survey	Clinical exam: Dental caries was recorded at tooth level according to the WHO diagnostic criteria18, and the DMFT index was used to obtain the prevalence of dental caries. The simplified oral hygiene index (OHI-S) (Green and Vermillion 1964) was used to assess the oral hygiene status.Gingival index (Loe and Silness 1963) 20 was used to assess the gingival health status. The Gingival Index records…	The questionnaire consisted of three parts. First two questions (question no. 1 and 2) assessed attitude, next eight questions (question no. 3-10) assessed oral health practice						In care	12-14 yrs 44.26% male	not reported	not reported	See Appendix 38 The PUFA ratio indicates 21% of decayed component had progressed to pulp involvement and abscess formation. The overall prevalence of PUFA was 37.7%. 31.1% children showed one or more pulpally involved tooth in their oral cavity. Correlation between periods for being the child in the institute to DMFT showed negative value indicting decrease in DMFT as the duration of stay in orph…		PUFA index is an effective index in evaluating clinical consequences of un-treated caries and help to understand and plan for treatment program in large for these socially deprived group of society. The result show oral health condition in orphan children living in institutionalized care was neglected. Children from this disadvantaged background have shown a high prevalence of dental caries with …	Teaching staff of orphanage should be educated regarding oral health care and its maintenance and they in turn educate the children regarding the same with proper supervision and reinforcement. It should be made mandatory for these children of orphanages to visit dentist either to dental college or government hospital at least once in 6 month. Implementation of prevention oriented comprehensive d…
Correlation of oral health status of socially handicapped children with their oral heath knowledge, attitude, and practices from India	Shanbhog et al. (2014)	To assess the source of information, level of knowledge, attitude, and practice toward oral hygiene and oral health among socially handicapped children from city of Mysore, Karnataka state, India.	Orphanage	Cross-sectional study	N/A	Not reported	India	Medium	Purposive	formal			Orphanages			488	N/A	Clinical exam Questionnaire	Dental caries was recorded at tooth level according to the WHO diagnostic criteria,[16] and the DMFT index was calculated as the sum of DMFT. The simplified oral hygiene index (OHI-S)[17] was used to assess the oral hygiene status, as score represents both debris and calculus (proxy indicators of oral hygiene) in one score, thereby permitting the correlation of oral hygiene with knowledge, attitu…	The questionnaire consisted of four parts. Five questions (questions 1-5) assessed sources of information on oral health, eight questions (questions 8-15) assessed knowledge, two questions (questions 6 and 7) assessed attitude, and seven questions (questions 16-22) assessed oral health practice of orphanage children. The children received a full explanation of how to fill in the questionnaire.						In care	12-14 yrs 44.26%male	not reported	not reported	See Appendix 39 The final data analysis included 488 children, of which 216 (44.26%) were boys and 272 (55.74%) were girls. A total of 88.5% children showed one or more decayed teeth in their oral cavity, with an overall mean DMFT of 3.55. Among DMF, component D showed maximum value with mean 3.42, followed by components F and M. Correlation between source of information, knowledge, and attitude …		Exploring the links between clinical conditions and their personal and social outcomes not only promotes a more complex appreciation of oral health but also provides the opportunity to identify interventions to minimize the consequences of oral diseases by conducting orphanage-based dental health programs. The oral health knowledge, attitude, and practice among orphanage children are still below …	In summary, information regarding oral health and its maintenance plays a vital role in maintaining disease-free oral cavity. Along with knowledge, positive attitude, and practice, which is supervised and reinforced can bring drastic improvement in oral health. In the present study, although children had a positive attitude, they lacked knowledge and practical application. To correct this, we rec…	Further studies evaluating the clinical consequences of untreated caries and quality of life of children residing in orphanages should be done to understand and plan for preventive and treatment programs at large.
Risk Factors and Treatment Needs among Orphan School Children	Shanthi et al. (2017)	To get an overview of the prevalence of DN worldwide and highlight the possible risk factors associated with it.		Cross-sectional study	N/A	N/a	Malaysia	Very high	Articles were included if they met the following criteria: (a) children and adolescents aged 0 or less than 19 years; (b) primary studies (all evidence types); (c) detailed char- acteristics of DN (oral, systematic, social, and behavioural) in children and adolescents; (d) the results suggesting that there were common features of DN including (1) failure to seek or delay in seeking dental treatme…	Formal					unclear/unrported	253	N/A	N/A	existance of dental neglect: Specific variables were used to define the existence of dental neglect in each of the stud- ies included. These are referred to as ‘operationalization of dental neglect’ in Table 3. Thomson et al.24 divided the Dental Neglect Scale (DNS) into two groups: DNS score of 13 or more was considered as the higher DN group and DNS score of 12 or less was considered as the low…							In care	0-16 years			Single parent and LAC were considered to be statistically significant risk fac- tors for DN in children.24,25	Although systematic reviews can provide valuable data on DN in children worldwide, this study has some limitations as well. Due to the under-reporting of DN in children, it was difficult to include studies that clearly examined DN. Also, the absence of Medical Subject Headings (MeSH) terms for DN made it difficult to search for relevant publications in the databases. The complex- ity of the topic…	In this study, the high prevalence of DN and lack of caries treatment affected the oral health of children. Knowledge of dental health, education of parents or care- givers, and parental attitudes towards oral health seem to be associated with the oral health of children. Moreover, looked-after children, children of refugees, and children in deprived communities are at high risk of DN. The conseq…	There is also a need to make policies that include reporting of DN to higher authorities by den- tal professionals. Dental professionals with public health workers should work together to ensure appropriate care for these children.	There is a need for research on DN in low-income and in high- income countries.
Comparative Evaluation of Powered and Manual Toothbrushes in Reducing Plaque and Gingivitis in Institutionalized Orphan Children	Shekhar et al. (2022)	undertaken to compare the efficacy of powered toothbrush with that of manual toothbrush in plaque removal and reduction of gingivitis, under unsupervised conditions, among 12-16 years-old institutionalized male orphan children.		RCT	Not reported	4 weeks	India	Medium	Purposive Children present on the day of the examination were included. The exclusion criteria were potentially uncooperative children; children with systemic disorders that affect the periodontal disease; five or more caries lesions requiring restorative treatment; exposure to anti- inflammatory or antibiotic therapy; and dental prophylaxis in the past six months	Formal			Orphanages			80	A dental health education including basic oral hygiene instructions was explained to the study subjects and caretakers by an audio-visual presentation. Subjects were then randomly allocated to two groups of 40 subjects each by throwing a coin; group 1 (manual toothbrush) and group 2 (powered toothbrush). Subjects in the manual toothbrush group were given a new manual toothbrush and those in the p…	Clinical exam	Oral health examination including recording of baseline plaque and gingival indices were conducted in the orphanages using an intra-oral LED light, disposable mouth-mirror, a Community Periodontal Index probe in accordance with American Dental Association Type III specification12. Assessment of gingivitis was done by scoring gingival inflammation on six sites (mesio-buccal, buccal, disto-buccal, …							in care	The mean age (Mean±SD) in group 1 was 13.29±0.95 years and in group 2 it was 14.08±0.90 years.	not reported	not reported	No statistically significant difference was noted between the two groups with regard to mean PI and MGI scores at baseline. The mean baseline PI score of the powered brush group was 1.01, whereas the mean baseline PI score of the manual brush group was 0.98. At four weeks post-intervention, the PI score of the powered brush group (0.59) improved when compared to that of manual brush group (0.63).…	The main limitations of this study were the short-duration of 4 weeks due to the rules of the orphan care house that was selected to conduct this study. However, this does not affect the results found in this study because studies in the literature evaluating the efficacy of manual and powered toothbrushes over shorter and longer periods of time had obtained similar results. Moreover, the present…	Within the limitations of this study, we conclude that the oscillating-rotating powered toothbrush group showed significantly more reduction in the plaque and gingivitis levels compared to the manual toothbrush group.		Further long-term trials with crossover design and larger sample may provide an insight into the merits and cost-effectiveness of powered toothbrush use in orphan children.
The health needs of Aboriginal and Torres Strait Islander children in out-of-home care	Shmerling et al. (2020)	To document the health needs of Aboriginal and Torres Strait Islander children and adolescents in OOHC seen by the paediatric service at the Victorian Aboriginal Health Service (VAHS) between February 2014 and February 2016		Cross-sectional study	N/a	2014 and February 2016	Australia	Very high	Purposive	Formal			58% were male and 42% female, with a male predominance across all age groups. The majority of children were pre-school (35) and primary school (51) aged, with 50% in kinship care, 42% in family-based (foster) care and 8% in residential care facilities.		unclear/unrported	103	N/A	Clinical data sets								in care	Age 0-18 yrs 58% male	not reported	not reported	Dental problem 40% dental problems <6yrs 13 (37%) out of 35 children , <13years 21 (41%) out of 51 children, 17 years 7 (41%) out of 17 children With the exception of overdue immunisation, the rates of physical, developmental and mental health needs in children and adolescents in OOHC seen at VAHS are high, much higher than the general population of children in OOHC	Data by Aboriginal and Torres Strait Islander status, and therefore disproportionality rates, should be interpreted with care as child protection agencies may not have full knowledge of the child's family circumstances. Relevant to the data we collected: The cohort studied in this audit was an urban Victorian population referred to a paediatric service in a primary care setting. While protocols i…	The rapidly increasing and disproportionate number of Aboriginal and Torres Strait Islander children entering the statutory care system is alarming. The high rates of physical and mental health and developmental needs identified in this study strongly support existing recommendations that children in the OOHC system need high-quality comprehensive health care that includes a culturally appropriat…	The Department of Families, Housing, Community Services and Indigenous Affairs has developed national standards relating to the health needs of children in OOHC. They emphasise the need for children and young people to have their physical, developmental, psychosocial and mental health needs assessed and attended to in a timely way through a preliminary health check on entering OOHC and referral t…
Prevalence and Severity of Dental Caries in Foster-Care Children and Adolescents	Solis-Riggioni et al. (2018)	: The aim of this study was to determine the prevalence and severity of dental caries among institutionalized children and adolescents in San José, Costa Rica		Cross-sectional study	N/A	Not reported	Costa Rica	Very high	Purposive (random selection within the shelters) Participants were recruited from 13 state shelters and 20 non-governmental organization (NGO) shelters in the province of San José; both the state and NGO shelters receive economic aid from PANI. The final study population consisted of 617 subjects (445 from the NGO and 172 from state shelters). Participants were screened following the pre-establis…	Formal			13 state shelters and 20 non-governmental organization (NGO) shelters i			201	N/A	Clinical exam	Clinical examinations were performed by a single examiner calibrated in the International Caries Detection Assessment System (ICDAS). Before the calibration, the examiner underwent a three- stage training process, which was supervised by an international gold standard authority in ICDAS.							in care	2 - 17 years Approx 50% male	not reported	A total of 128 participants (63.6%) had been insti- tutionalized for at least one year.	DC was present in 96.35% of the sample (Figure 1). DC prev- alence according to sex (p=0.653), age group (p=0.34), and reason for foster-care admission (p=0.999) was not statistically significant. Figure 2 shows the severity of DC in the examined surfaces. Of the 1635 surfaces with DC, the majority corresponded to codes 1/2 (1296 surfaces), followed by codes 3/4 and 5/6 (228 and 111 surfaces, res…		The prevalence of DC in Costa Rican foster-care children was 96.35%. No significant differences for gender or age group were found. The lower molars showed a higher prevalence of caries (both permanent and deciduous teeth). Within affected tooth surfaces, the most common caries were early enamel lesions (code 2), followed by codes 3/4 and 5/6. Special strategies must be developed to prevent, diag…	Special strategies must be developed to prevent, diagnose, and treat DC in this vulnerable population
A peer group approach model of oral health promotion among orphans at Puduchery, South India	Sushanth et al. (2011)	The objective of this study is to assess the effectiveness of peer group health promotion model among 11 to 16 year old orphans at Puduchery, South India.		Clinical trial	unclear	6 months	India	Medium	All the orphans who complied with the informed consent and had good general health were included in the study. Orphans who were involved in active orthodontic treatment and any other condition that would interfere with the examination procedure were excluded. After the collection of data in the phase I, all the children attending the experimental orphanage took part in the Oral Health Promotion p…	Formal (institution)			orphanage			72	Oral health education was provided to 4 randomly picked children who in turn provided the same to their peer group orphans, supervised by the investigator. Tooth brushes and fluoridated tooth pastes were provided to all the participants throughout the study period. These activities focused on integrating oral health education into the general curriculum of training and education for health. Activ…	Clinical exam Questionnaire	Oral hygiene of the participants was assessed using Modified Plaque Index by Loe H and Gingival Index by Loe H and Silness at baseline, 3rd and 6th month interval. Paired Student t test was used to analyze the categorical data. Clinical examination of the orphans was carried out using American Dental Association (ADA) type III examination, protocol. The oral examination was carried out under natu…	All randomly picked orphans were instructed in the use of a health education manual encompassing an appropriate booklet, and a guide for including oral healthcare practices into their daily routines. The instructions to the orphans focused on general health, oral health, teeth and their functions, dental plaque and tooth decay, diet, sugar and health (general and dental), self care for oral healt…						in care	11 to 16 yrs	Not provided	Not provided	See Appendix 2 Majority of the respondents felt consuming sugar was not harmful for dental health, while 15 respondents were not sure about the outcome. When asked if oral hygiene was important for general health, 45.8% were not aware of its association. Although all the participants brushed their teeth daily, none of them reported the use of dental floss. The findings of this study indicated a s…	The present study was not without any limitations. The sampled population was restricted to a single orphanage at Puduchery in South India. Further, knowledge levels of the orphans were not assessed at the end of the study. However, this was not performed because the investigator felt that the oral hygiene at the end of the study could be taken as an indirect measure for their knowledge levels. A…	The present study has shown a definite reduction in the mean oral plaque and gingival scores among study participants by using the medium of peer group health education.	Further studies have to be conducted with a greater number of participants to extrapolate the efficacy of the peer group health education model approach.
Periodontal and Dentition Status among Orphans and Children with Parents in Mysore City, India: A Comparative Study	Thetakala et al. (2017)	To explore periodontal and dentition status among orphans and children with parents in Mysore city, India.		Cross-sectional	N/A	March to August 2015	India	Medium	Purposive	Formal			Orphanage			957 children (478 from orphanages and 479 from government schools)	N/A	Clinical exam	All the examinations were performed in their respective school premises on a normal chair under natural light and using sterilized instruments. The children were examined by the investigator and relevant information (periodontal and dentition status) was entered on WHO oral health assessment form [18] by a trained dental assistant (intern). Total caries experience (defs/DMFT) was derived and anal…							in care	6- 15 yrs Approx 50% male	Not provided	Not provided	A total of 957 children (478 from orphanages and 479 from government schools) were examined in the study. The mean defs and DMFS were significantly higher among government school children (non orphans) (defs: 3.20±4.0; DMFS: 2.43±2.8) compared to children from orphanages (defs: 2.72±4.4; DMFS: 1.72±2.3). Prevalence of gingival bleeding among orphans (79.49%) was higher compared to non orphans (71…	As in any research, the present study is also not without limitations. The present study design being cross-sectional makes it difficult in identification of causal relationships. Our results could be generalized only to the high risk group of disadvantaged children residing in orphanages and government school children of low socioeconomic status.	Although, prevalence of caries was lower among orphans, periodontal status was poor among them as compared to non orphans. However, oral health care services needs to be offered for all the children, there is an apparent need for implementing oral health programmes to target the government schools in particular and orphanage homes in general for prevention of oral diseases that leads to the bette…	Based on the results of the present study it can be recommended that screening programs and preventive dental health programs should be organized on regular basis to assess oral health status and to make provision so as to fulfill dental needs of these high risk groups. Oral health promotion and reinforcement of knowledge through well structured oral health education programs can create positive …
Perception of oral health and practices among children residing in orphanages in Bengaluru	Unnikrishnan et al. (2022)	This study attempts to assess the perception of oral health and practices among children residing in orphanages in Bengaluru.		Cross-sectional study	N/A	Not reported	India	Medium	Purposive	Formal			Orphanage			269	N/A	Survey	toothache	The questionnaire was obtained from the World Health Organization's Oral Health Basic Survey Methods.[10] There are 14 items about the perception of oral health and habits in the questionnaire	dental visits	The questionnaire was obtained from the World Health Organization's Oral Health Basic Survey Methods.[10] There are 14 items about the perception of oral health and habits in the questionnaire				in care	12 -7 yrs 59.1% male	Not provided	Not provided	See Appendix 40 One hundred and fourteen participants rarely had any experience of toothache, while 72 reported had a pain occasionally and 43 had never experienced a toothache in the past 12 months. The difference in the experience of pain was statistically significant (P < 0.05).The self-assessment and practices of the study participants varied significantly. The proportion of substance abuse w…		Orphanage children's oral health practices and dental visit patterns are inadequate. It is possible to conclude that this community has a low utilization of preventive or therapeutic oral health services.	The findings of this study suggest that awareness of the importance of oral health should be increased among Bengaluru's orphanage children.
Frequency and severity of dental caries in foster care children of Turin, Italy: a retrospective cohort study	Valpreda et al. (2020)	to assess the frequency and severity of dental caries (DC) among foster care children in the city of Turin, in North West Italy, and to compare these data with those of a general paediatric population.		retrospective cohort study	N/A	Not reported	Italy	Very high	Purposive	Formal					Unclear- 'foster home'	75	N/A	Clinical exam	The first appointment was performed at che child’s foster home. Through a 45–60 minutes learn-through-play approach, they were taught on the main characteristics of the teeth and the main roles played by the oral cavity in eating, speaking, and swallowing. Basic notions were also provided concerning the onset of dental caries and its correlations with oral hygiene and diet. At the end of the sess…							In care	4-12 years	Not provided	Not provided	Of 75 patients (35 M; 40 F; mean age: 8.5 ±3.17 years old), 13 (17%) were caries-free. Among the remaining 62 patients, 187 caries were identified. Of these, 133 were PC (110 within the deciduous teeth), of which 88 as ICDAS code 5 and 45 as ICDAS code 6, whereas 54 were nPC (32 within the deciduous teeth), of which 3 as ICDAS code 1, 12 as ICDAS code 2, 25 as ICDAS code 3, and 14 as ICDAS code 4…		To our knowledge, this is the first attempt to assess the dental and oral health status among foster care children in Italy, with no prior publication in literature. The present study revealed a statistically significant higher frequency of caries in foster care children when compared to the general paediatric population in Italy. Further epidemiological investigations on larger foster care child…	The main challenge ahead lays in the necessity to provide steady and appropriate treatment of the high number of caries we detected on deciduous teeth. Such a condition can compromise the switch between primary and secondary dentition, leading to further difficulties in eating, speaking, aesthetics and social interactions.
A tailored tooth brushing program to control plaque accumulation and gingivitis among orphan children: A randomized trial	Vijayasekaram et al. (2020)	The objective of the study was to assess the efficacy of a tailored tooth brushing program to improve supragingival plaque control and gingival health among 13–17-year-old orphan children in Chennai city over a period of 21 days.		RCT	Unclear	January to March 2015	India	Medium	Purposive	Formal			Orphanage			60	The selected participants were randomly allocated into two groups by the second investigator using the lottery method. The study group children were educated using audiovisual presentation of the modified Bass technique and individual one to one demonstration of technique using cast and brush and reinforced by the SI on the 14 days follow-up. The control group subjects had only one to one individ…	Clinical exam	During the initial visit, participants were requested to abstain for oral hygiene practices for 48 h and the baseline plaque was were recorded using Turesky modification of the Quigley-Hein plaque index (TMQHPI);[12] severity of gingivitis recorded using gingival index. Those fulfilling the inclusion criteria of having a high plaque score and moderate gingivitis were included in the trial.							In care	14-17 yrs 55% female	not reported	not reported	Repeated measures ANOVA test showed a statistically significant reduction (P < 0.05) in mean plaque and gingival index scores from baseline to all subsequent follow-up in both groups. Post hoc analysis revealed significant reduction (P < 0.05) in the mean plaque and gingival index scores from baseline to day14 and baseline to day 21 for the study and control groups; but only study group elicited …	Hawthorne effect could have played a role since the reduction in total plaque was observed both in study and control groups which could be considered a limitation of the study, and contamination bias could have influenced participants but the provision of device to both the study and control groups prevented this bias.	The study group subjects who used the novel device exhibited superior total plaque control and significantly lesser gingival inflammation compared to control group and continued to demonstrate modified Bass technique without any reinforcement at the end of 21 days trial.
Health and health care for children in out of home care	Vinnerljung, B and Hjern, A (2018)			Editorial			Europe, North America, Australia	Very high				Unclear			Unlear	N/A		N/A									N/A			Dental health – although there is far less research in this field compared with physical and mental health; In addition, a large body of research shows that many of these children will suffer substantial health problems over the life course affecting their physical, dental and mental health. In Ireland, national legislation stipulates, in addition, that children in out-of-home-care have prioritis…
Inter-relationship of intelligence-quotient and self-concept with dental caries amongst socially handicapped orphan children	Virk et al. (2012)	To study the effect of parental inadequacy, environmental deprivation, and emotional disturbances on dental caries through intelligence quotient (IQ) and self-concept in orphan children and also to co-relate dental caries with different levels of IQ and self-concept		Cross-sectional study	N/A	Not reported	India	Medium	Purposive	Formal			Orphanage			100	N/A	Questionnaire clinical exam	Surface- wise recording of dental caries was done as per WHO Index (1997) on a modified Unilever Dental Chart using a mouth mirror and ordinary dental probe.[13]			A sequence of recording for IQ, self-concept, and dental caries was followed. Malin’s Intelligence Scale for Indian Children (MISIC) was used to assess the IQ. This is an Indian adaptation of Wechsler’s Intelligence Scale for Children (WISC) and embraces all the advantages of the original scale along with several improvements. [12] This scale is used to assess both the verbal and performance IQ o…				In care	10-14 yrs Approx 50% male	not reported	not reported	The children in orphanages had a lower IQ and high caries experience but had an above average self- concept. There was also no co-relation between dental caries and self-concept. According to Wechsler Bellevue Classification of Intelligence (W-BI), children were divided into three groups, namely group I or average, group II or dull normal, and group III or borderline [Table 1]. In this study, the…		Orphan children, being socially handicapped, are at an increased risk for dental caries due to a lower IQ level, parental deprivation, and institutionalization. Moreover, lack of co-relation between dental caries and self-concept could be explained by the fact that dental caries is a lifelong process whereas different dimensions of self-concept are in a state of constant flux.
Medical and social issues of child refugees in Europe	Williams et al. (2016)	Paediatricians assessing both unaccompanied and accompanied refugee children must be alert to the possibilities of nutritional deficiencies, infectious diseases, dental caries and mental health disorders and be aware of the national and international health guidance available for support.	Refugee camp	Commentary	N/A	N/A	UK	Very high	N/A	Formal					Unaccompanied refugee children	N/A	N/a	N/A	N/a	N/a	N/a	N/a					N/A			In the UK, in a cohort of 75 unaccompanied asylum-seeking child (UASC) presenting to a single paediatric clinic in Kent, mental health was of concern to the clinician in 92% of cases. Dental decay was evident in 65% and abnormal physical findings in 76% of children		The political debate around migrants and refugees—and the UK's appropriate response and role—will likely continue to rage. In the meantime, asylum-seeking children, in refugee camps, in transit across harsh regions, on the European mainland and here in the UK, are exposed to unacceptable levels of physical and psychological harm. The rights of refugee and asylum-seeking children are enshrined in …
Case-control study of the health of those looked after by local authorities	Williams et al. (2001)	To assess the health needs and provision of health care to school age children in local authority care.		Cross sectional	N/a	N/a	UK	Very high	Purposive Children who had been looked after by a local authority for more than six months were included, provided they were over 4 and under 17 on 1 November 1997.	Fomal					Local authority care included placements with foster families, relatives or friends, or in community homes.	142	N/A	Interviews		All interviews took place in the children's homes or on neutral territory to avoid any risk of stigmatisation. They were undertaken by trained contract researchers, and took 30–45 minutes, depending on the age of the child and the complexity of any issues raised. Whenever possible children over 11 were interviewed on their own. Two sections of the Looking After Children Assessment and Action Reco…						In care	5-16 yrs	Not reported	Not reported	See Appendix 43 However, fewer looked after children visited a dentist regularly, and they were significantly more likely to need treatment when they did.		In conclusion, although the physical health of children in care in south west Wales is no worse than that of children living in their own homes, there are still serious deficiencies in their overall health and well being, particularly in emotional health and behaviour. It is essential that health service provision for looked after children is given high priority in the future planning of health a…	School may be the first place where mental health problems manifest themselves. The school health service could play a more proactive and supportive role and social workers need to be in close touch with schools over health as well as educational issues, including health education. There is a need for Social and Education Services to work together, which has been clearly documented in relation to…
The Dental Health of Orphan and Non-orphan Children in Fuyang City, China	Xu et al. (2021)	to gain understanding of the dental health management riskd faced by orphan children, and further guide the follow-up dental health care measures for them		Cross-sectional	N/A	3 months	China	High	Purposive	Formal			Social child welfare institutes			332 orphans, 590 control	N/A	Clinical exam Survey	China National Dental Health survey clinical exam- DMF indices (primary teeth children aged 3-5. permanent teeth aged 12-15)and % of caries. % of teeth per child exhibiting gingival beleeding and dental calculus was used to evaluate the peridontal status of all children 12 -15 years Jo- I'm a bit confused here- what was the purpose of the survey? Was it just used to identify the children?							In care	3-5yrs and 12-15yrs	Not reported	at least 3 years in instituteprior to survey	Among the 332 orphaned children 23.5% were in the three to five year age group, and 76.5% were in the 12 to 15 year age group. Among the 590 non orphan children 19.2% were in the three to five year age group, and 84.1% were in the 12 to 15 age group. The total percentage of carries in non-orphaned children aged three to five years (64%) was statistically significantly lower (p<0.05) than that of …	It should be emphasised that the population investigated in this study was only orphan children from social Child Welfare Institute's and students from two schools, which may not fully reflect the dental health of orphaned children and non-orphan children. Therefore, a more extensive and Representative oral epidemiology logical investigation is needed to increase the attention paid to the dental …	The maintenance of periodontal health was an issue for both groups of children, which could be addressed by an improvement in the periodontal health education of all workers in the field of stomatology. The dental health of orphan children is significantly worse than their non-orphan counterparts, which indicates that the dental health promotion of orphaned children is insufficient. The results o…	Our department will set up an oral health promotion team for orphaned children to conduct regular oral health surveys. through the comparison of the results of surveys, we will intervene for specific factors. At the same time we will carry out oral health education for different age groups. to help them develop good oral habits.
Prevalence of malocclusion among 12 to 15 years age group orphan children using dental aesthetic index	Yusuf et al. (2013)	to assess the prevalence of malocclusion and orthodontic treatment needs among children and adolescents residing in orphanages of Bilaspur, Chattishgarh India. Moreover, to evaluate the orthodontic treatment needs among them.		Cross-sectional	N/A	November 2011 to March 2012.	India	Medium	Purposive All the available children and adolescents residing in the orphanages (Government and private) of Bilaspur district formed the study population.	Formal			Orphanages			165	N/A	Clinical exam	Clinical examinations were carried out at the institute’s classroom or outside in the corridor with the aid of a mouth mirror and CPI (Community Periodontal Index) probe under adequate natural day light (Type III examination) as described in World health organization (WHO) Oral Health Survey Basic Methods (1997).[13] Duplicate examination was conducted on 5% (n = 44) of the population during the …							in care	12-15 63% male			See paper The prevalence of definite, severe and very severe malocclusion was more among males than females and it increased with age. 16.4% subjects needed orthodontic treatment ranging from slight to mandatory form.		Overall, the findings confirmed that orphans had increased prevalence of malocclusion	The prevalence and severity of malocclusion was more among orphan children as they are deprived of healthy lifestyle. So, they should be identified and corrective measures instituted at the earliest to prevent a widespread impact on their psychological development.	future researches are still required in this direction with more adolescent samples.
Health, Developmental and Support Needs of Vulnerable Children: Comparing Children in Foster Care and Children in Need	Raman, S and Sahu, S. (2014)	We wanted to identify the physical, psychosocial and developmental needs of the population of children seen in the CP clinics for ‘at risk’ children in SWS, and to compare the health and service needs of children in FC with those in parental care. The broader aim was to develop pathways and best practice models of assessment and care that suit the needs of vulnerable children exposed to a range o…		Cross-sectional study	N/A	December 2007 to 2008	Australia	Very high	Purposive ‘The study population consisted of all children aged from birth to 18 years who attended the Branches clinics’ Those in foster/kinship care- N=56 ( 57%) the rest were in parental care, information on whether these included stepfamilies or blended families was not available. Overall, 88 per cent of the children faced one or more forms of documented abuse whilst living with their biologic…			Unclear			Foster/kinship care	56 foster/kinship care 42 control	N/A	Retrospective chart/register review	dental problems N=25 (26%)								0- 15 yrs 56 % male	Not reported	Not reported	Dental problems- 23.8% parental care, 26.8% foster care, p=0.92 Dental, fine motor or vision concerns were identified in about a quarter of the children,	The present study was based on a referred clinical population and therefore cannot be considered truly reflective of the socially at-risk paediatric population residing in SWS. The clinic population was limited because the vast majority of referrers were welfare workers from the statutory agency in the state. Referrals from Community Services did not mean that our clients were involuntary clients…	Results from the current study based in an urban high-risk population in Sydney suggest that it is possible to set up proactive pathways for paediatric assessment and care for children at social and environmental risk. As Kirk et al. (2010) demonstrated, comprehensive medical examinations are an important component in the assessment of child abuse, not only to support the allegations, but also to…	In this study, 90 per cent of the clinics were staffed by collaborative clinical teams involving at least two disciplines. Only ten per cent of the clinics were staffed by medical staff (i.e. paediatricians and trainee paediatricians) alone. Given the range of health, developmental, psychosocial and behavioural problems identified in these children, it is ideal to service such clinics with health…
